# Supplementary material
Source: PubMed Central journal article supplement (PMC8678903)
Supplement: jamaotolaryngolheadnecksurg-e213567-s001.pdf [file jamaotolaryngolheadnecksurg-e213567-s001.pdf]

## Supplemental Online Content

Damgacioglu H, Sonawane K, Zhu Y, Li R, Balasubramanian BA, Lairson DR, Giuliano AR, Deshmukh AA. Oropharyngeal cancer incidence and mortality trends in all 50 states in the US, 2001-2017. *JAMA Otolaryngol Head Neck Surg*. Published online December 16, 2021. doi:10.1001/jamaoto.2021.3567

### **Supplementary Figures**

**eFigure 1.** Diagram depicting the sample flow of the study population

**eFigure 2.** Rate Ratios for oropharyngeal cancer among men and women in the incidence rates, comparing incidence rates in 2015-2017 versus 2001-2003, among age groups of major race/ethnic subgroups

**eFigure 3.** Burden (annual number of cases) of oropharyngeal cancer according to race/ethnicity, age, and stage at diagnosis among men and women: NPCR and SEER (2001-2017)

**eFigure 4.** Annual number of oropharyngeal cancers diagnosed among men and women according to geographic regions

**eFigure 5.** Average annual percentage change in oropharyngeal cancer incidence among men and women by US state and Washington, District of Columbia: NPCR and SEER (2001-2017)

**eFigure 6.** Oropharyngeal cancer incidence among men and women in 2001 and 2017 by US state and Washington, District of Columbia: NPCR and SEER (2001-2017)

**eFigure 7.** Oropharyngeal cancer burden among men and women in 2001 and 2017 by US state and Washington, District of Columbia: NPCR and SEER (2001-2017)

### **Supplementary Tables**

**eTable 1.** Overall oropharyngeal cancer incidence among men and women by race/ethnicity, age at diagnosis, SEER summary stage at diagnosis, US region, and tumor size during 2001-2017 in the United States

**eTable 2.** Overall and Sex, Race and SEER Summary Stage specific Oropharyngeal Squamous cell carcinoma Incidence Rates During 2001-2017 in the United States

**eTable 3.** Sex and race-stratified oropharyngeal cancer incidence rates over calendar year during 2001-2017 in the United States

**eTable 4.** Age-specific oropharyngeal cancer incidence rates over calendar year during 2001-2017 among men in the United States

**eTable 5.** Age-specific oropharyngeal cancer incidence rates over calendar year during 2001-2017 among Women in the United States

**eTable 6.** Oropharyngeal cancer incidence rates during 2001-2017 according to SEER summary stage at diagnosis among men in the United States

**eTable 7.** Oropharyngeal cancer incidence rates during 2001-2017 according to SEER Summary Stage at Diagnosis among women in the United States

**eTable 8.** Rate ratios for oropharyngeal cancer incidence rates during 2001-2017 among men in the United States

**eTable 9.** Rate ratios for oropharyngeal cancer incidence rates during 2001-2017 among Women

**eTable 10.** Trends in oropharyngeal cancer incidence rates during 2001-2017 among men in the United States

**eTable 11.** Trends in oropharyngeal cancer incidence rates during 2001-2017 among women in the United States

**eTable 12.** Trends in oropharyngeal cancer incidence rates according to state residency during 2001-2017 among men in the United States

**eTable 13.** Trends in oropharyngeal cancer incidence rates according to state residency during 2001-2017 among men in the United States

**eTable 14.** Observed and incidence-based Oropharyngeal Cancer Mortality Rates<sup>a</sup> by Sex During 2001-2017

This supplemental material has been provided by the authors to give readers additional information about their work.

**eFigure 1.** Diagram depicting the sample flow of the study population

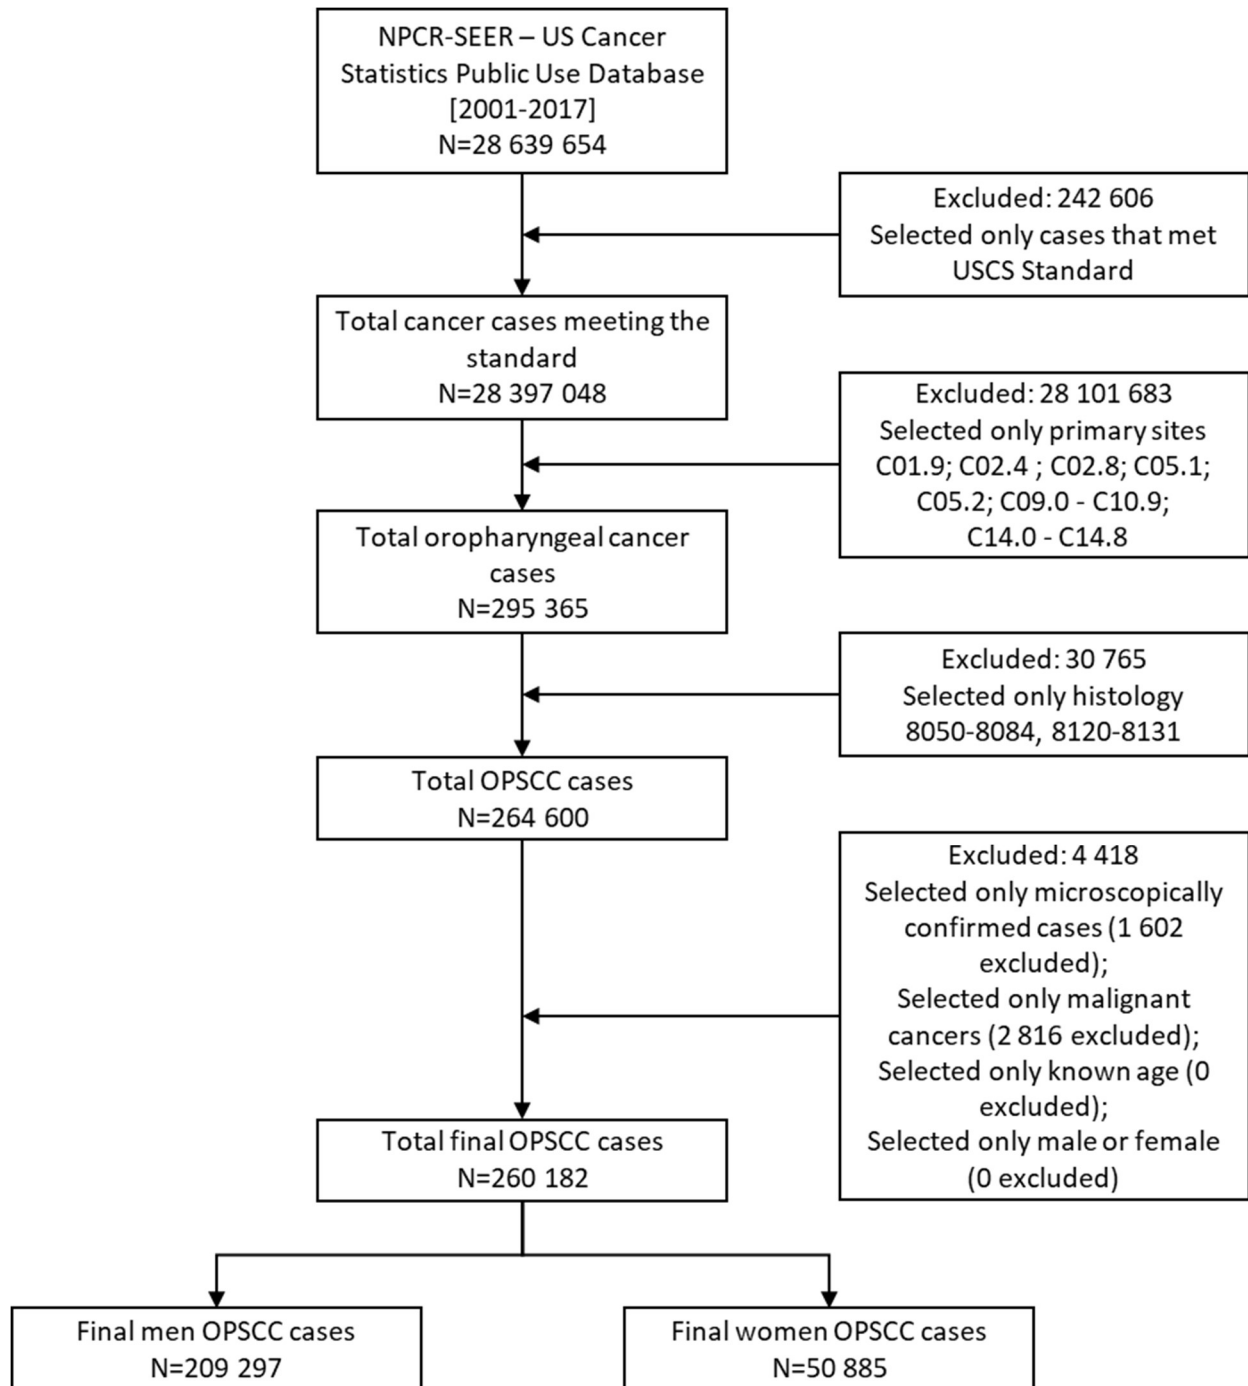

**eFigure 2.** Burden (annual number of cases) of oropharyngeal cancer according to race/ethnicity, age, and stage at diagnosis among men and women: NPCR and SEER (2001-2017)

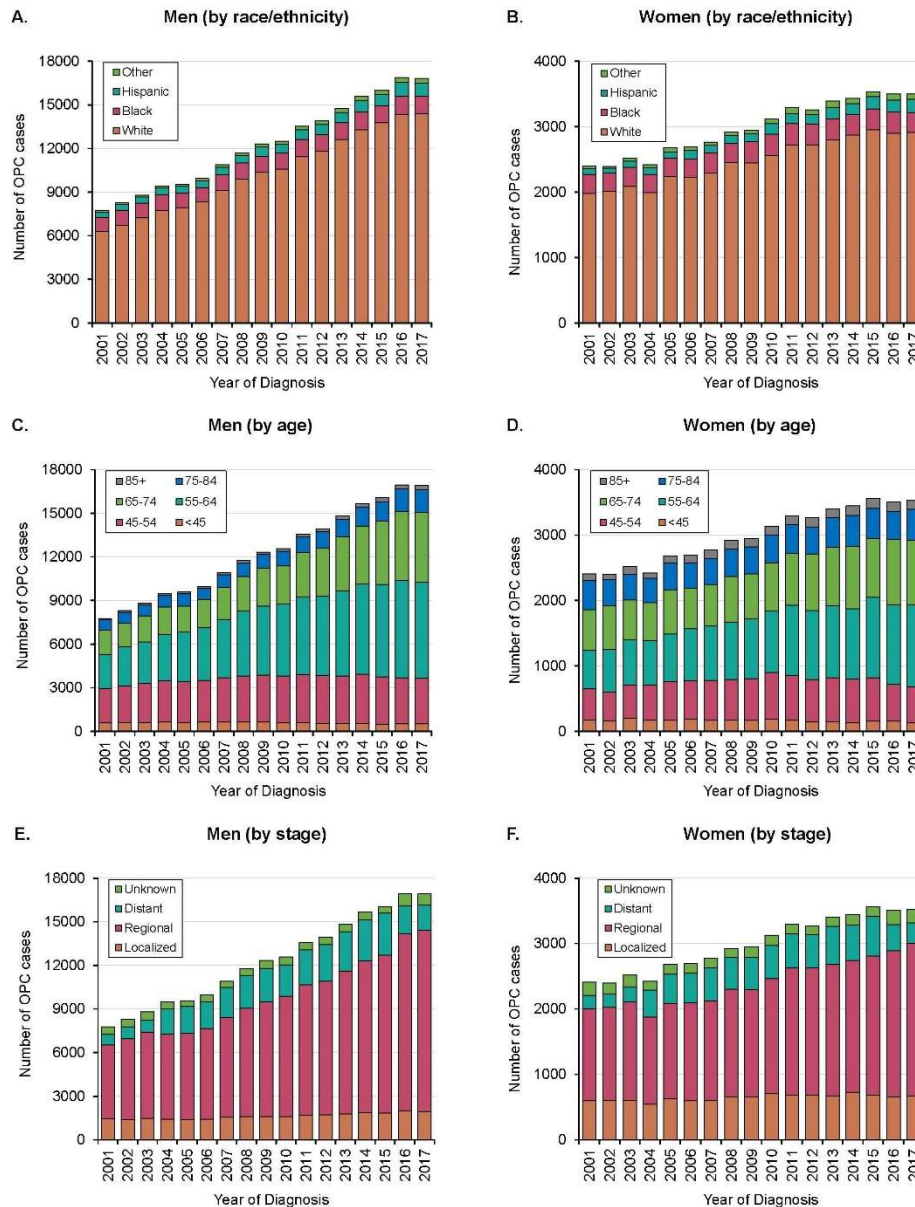

Vertical bars represent the burden (annual number of cases). Panels **A** and **B** show burden according to race/ethnicity in men and women, respectively. Panels **C** and **D** show burden according to age at diagnosis in men and women, respectively. Panels **E** and **F** show burden according to the stage at diagnosis in men and women, respectively. Abbreviations: NPCR, National Program of Cancer Registries; SEER, Surveillance Epidemiology, and End Results program

**eFigure 3.** Rate Ratios for oropharyngeal cancer among men and women, comparing incidence rates in 2015-2017 versus 2001-2003, among major race/ethnic groups: NPCR and SEER (2001-2017). Also See Supplement Tables S7 and S8.

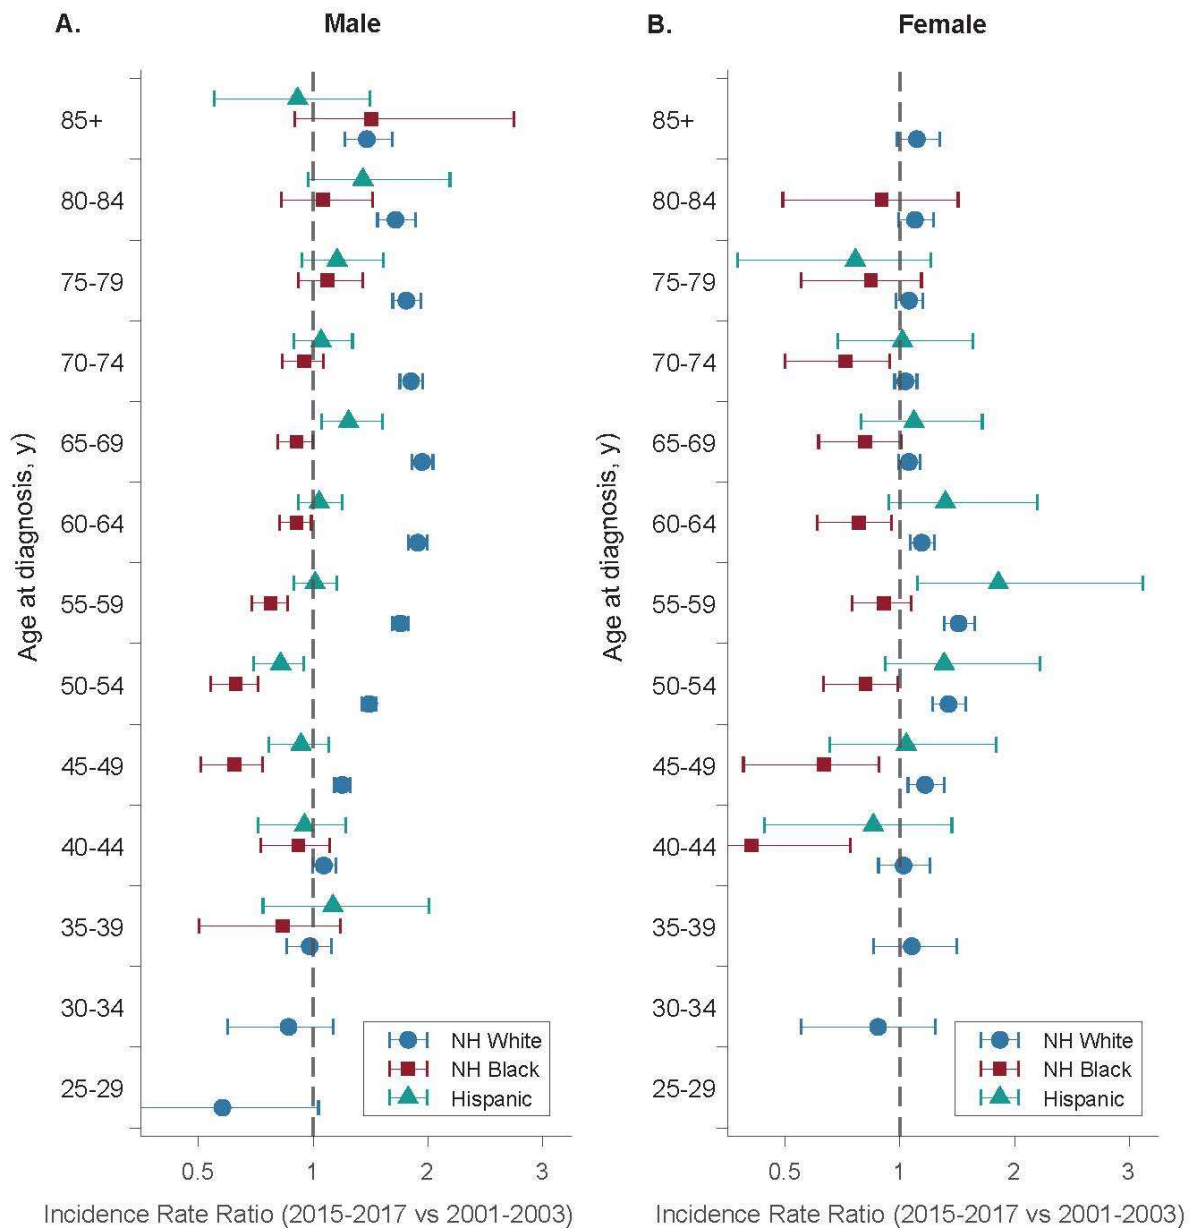

**Panel A** illustrates rate ratios comparing incidence rates in 2015-2017 versus that in 2001-2003 among White men, Black men, and Hispanic men. **Panel B** illustrates rate ratios comparing incidence rates in 2015-2017 versus that in 2001-2003 among White women, Black women, and Hispanic women.

Abbreviations: NPCR, National Program of Cancer Registries; SEER, Surveillance Epidemiology, and End Results program

**eFigure 4.** Annual number of oropharyngeal cancer cases diagnosed among men and women according to geographic regions

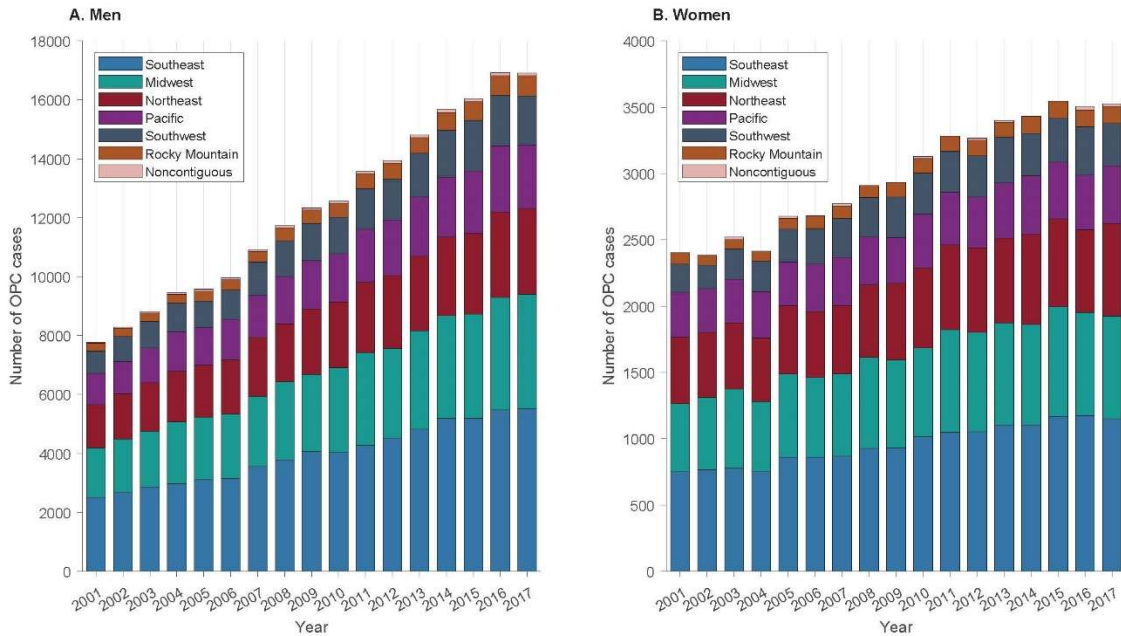

**Panels A and B** illustrate oropharyngeal cancer burden among men and women, respectively, according to seven geographic regions—Northeast, Southeast, Midwest, Rocky Mountain, Pacific, Southwest, and non-contiguous.

**eFigure 5.** Average annual percentage change in oropharyngeal cancer incidence among men and women by US state and Washington, District of Columbia: NPCR and SEER (2001-2017)

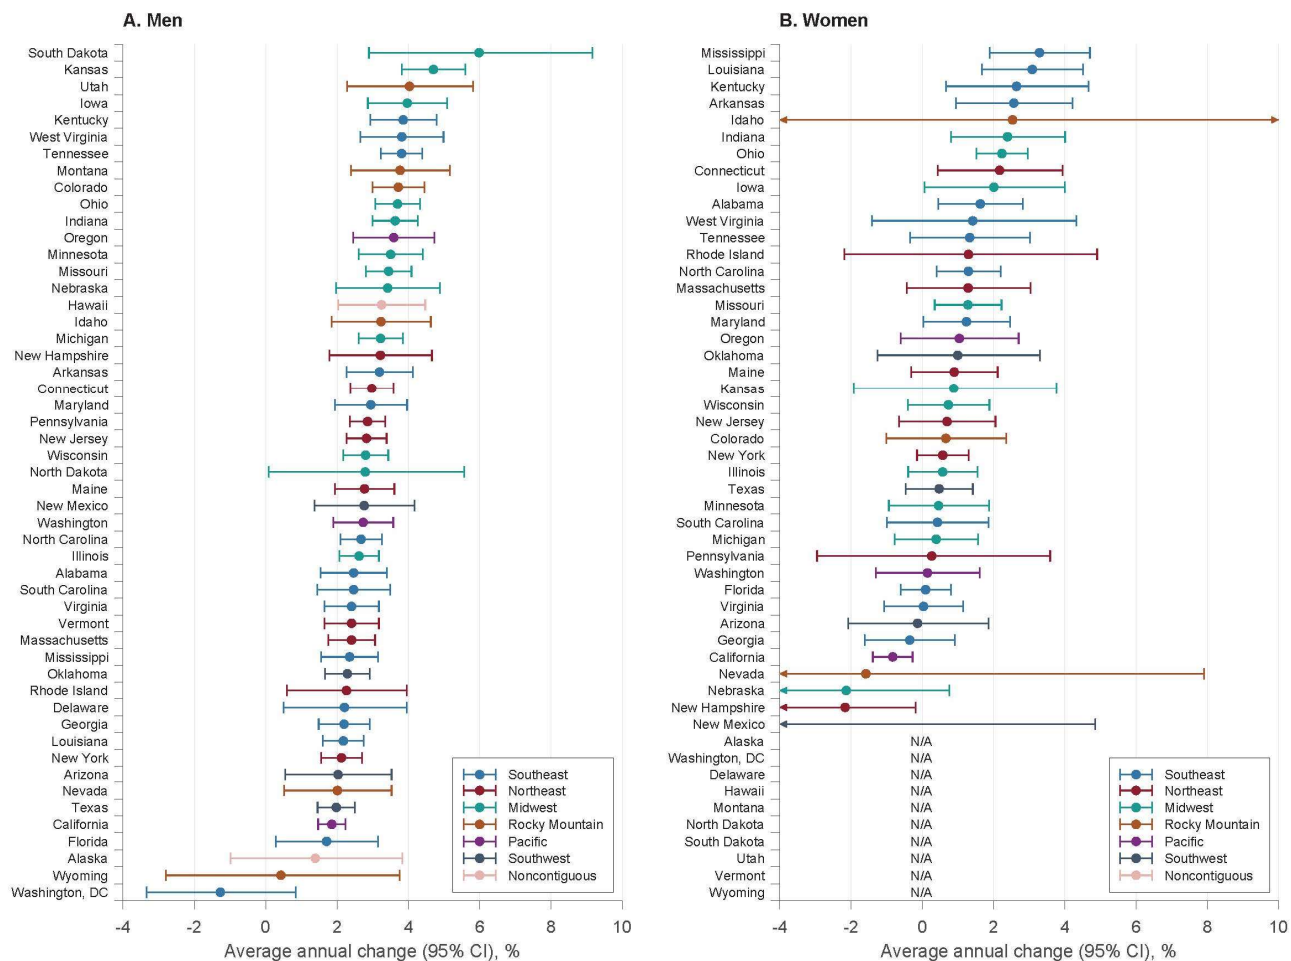

**Panels A and B** illustrate the average annual percentage change from 2001 to 2017 among men and women, respectively, by US states stratified according to seven geographic regions—Northeast, Southeast, Midwest, Rocky Mountain, Pacific, Southwest, and non-contiguous.

**eFigure 6.** Oropharyngeal cancer incidence among men and women in 2001 and 2017 by US state and Washington, District of Columbia: NPCR and SEER (2001-2017)

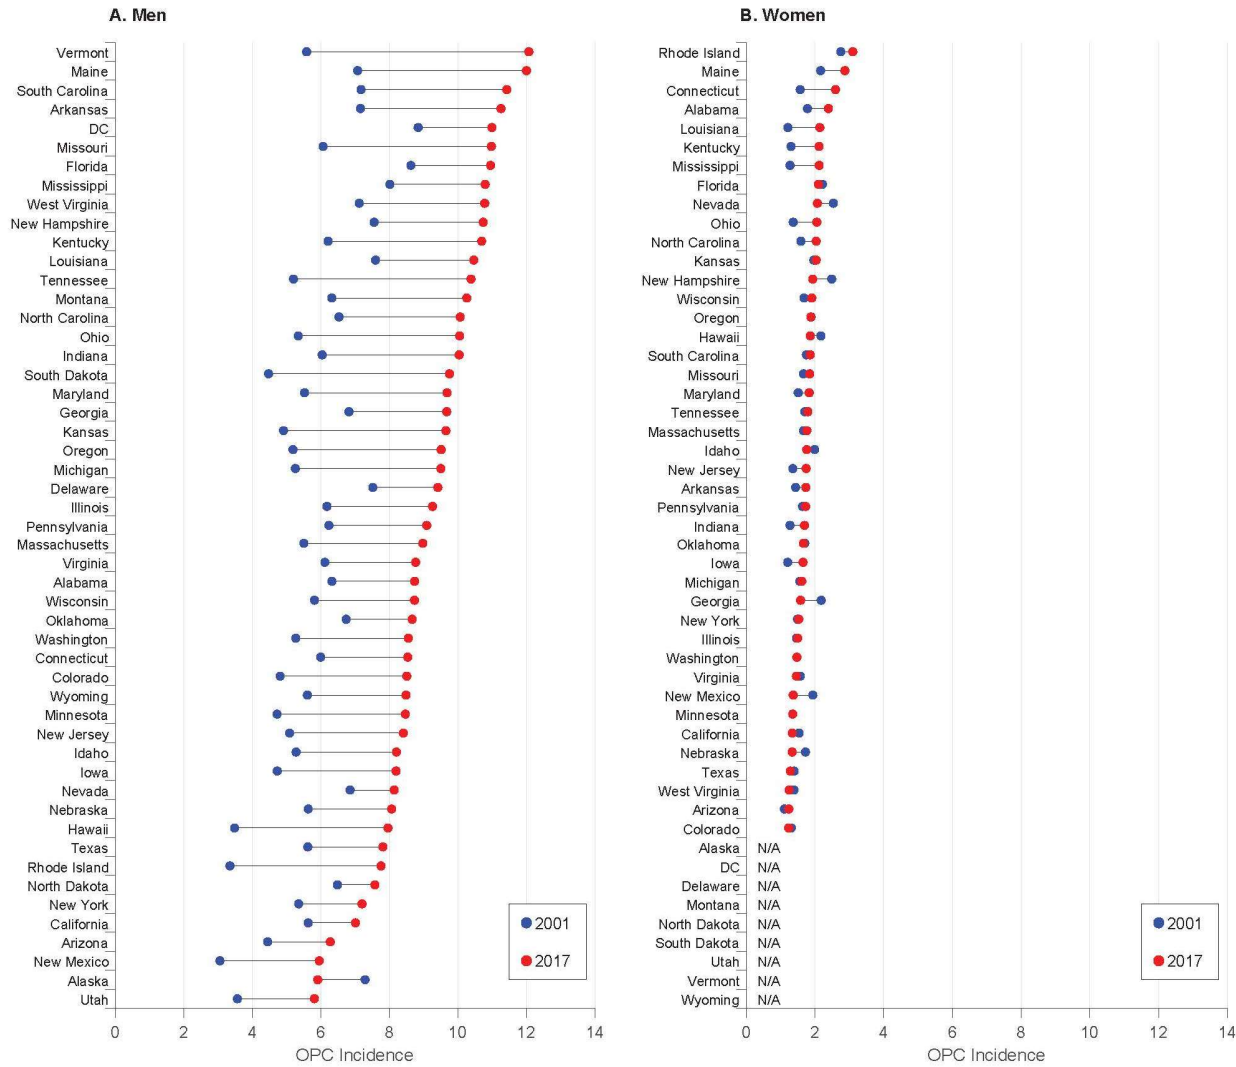



**eFigure 7.** Oropharyngeal cancer burden among men and women in 2001 and 2017 by US state and Washington, District of Columbia: NPCR and SEER (2001-2017)

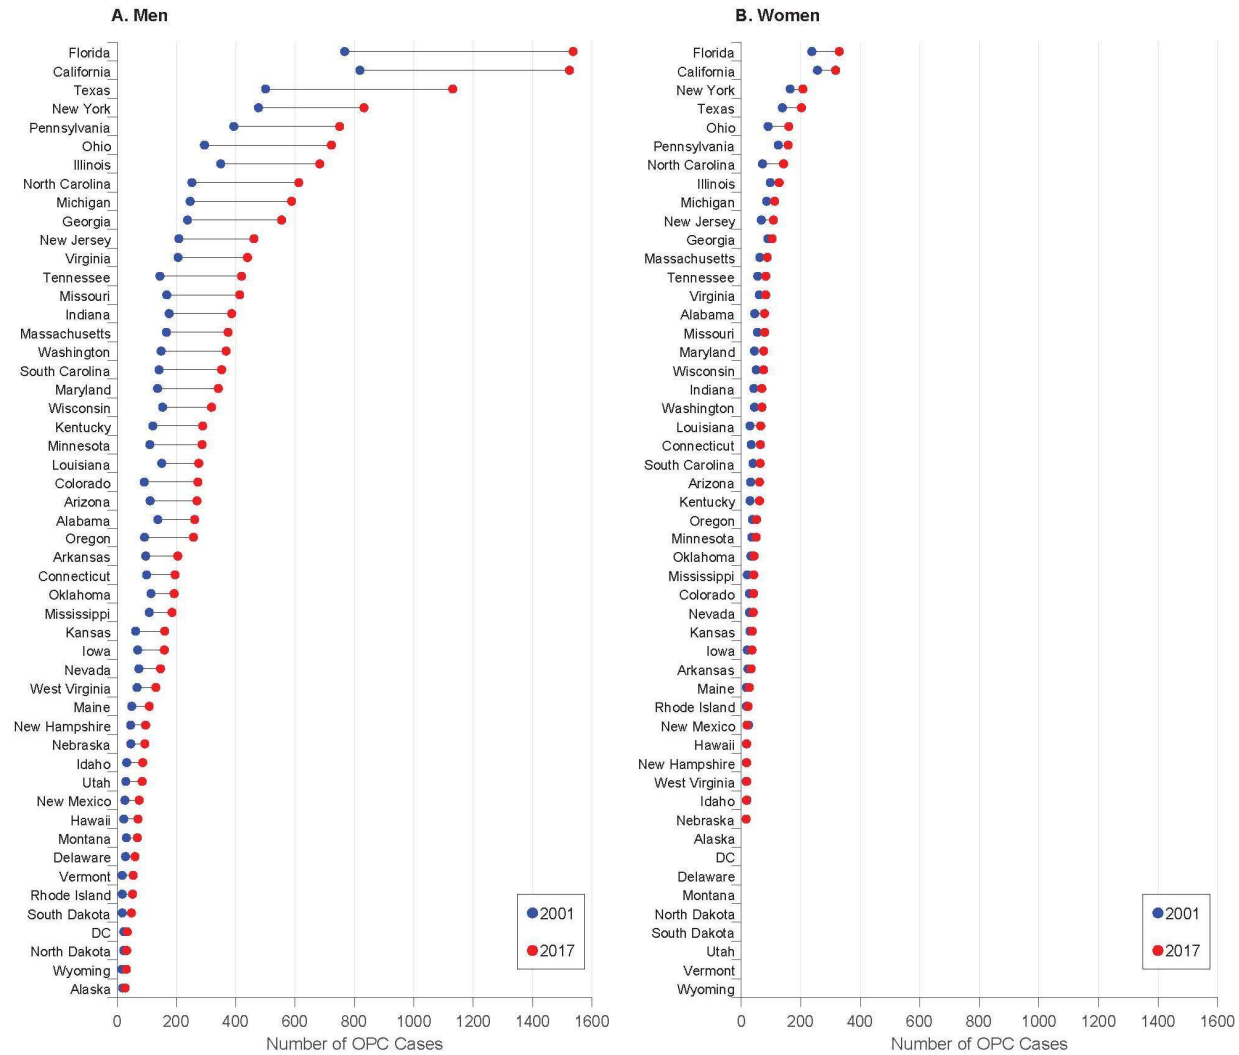

**eTable 1.** Overall oropharyngeal cancer incidence among men and women by race/ethnicity, age at diagnosis, SEER summary stage at diagnosis, US region, and tumor size during 2001-2017 in the United States

| Characteristics           | Men            |                            | Women         |                            |
|---------------------------|----------------|----------------------------|---------------|----------------------------|
|                           | Cases No. (%)  | Rate <sup>a</sup> (95% CI) | Cases No. (%) | Rate <sup>a</sup> (95% CI) |
| <b>NPCR-SEER Database</b> |                |                            |               |                            |
| Overall                   | 209,297 (100)  | 7.64 (7.60 – 7.67)         | 50,885 (100)  | 1.67 (1.66 – 1.68)         |
| Race/ethnicity            |                |                            |               |                            |
| NH White                  | 175,814 (84.0) | 8.47 (8.43 – 8.51)         | 42,142 (82.8) | 1.85 (1.83 – 1.87)         |
| NH Black                  | 18,720 (8.9)   | 7.19 (7.08 – 7.30)         | 5,182 (10.2)  | 1.58 (1.54 – 1.62)         |
| Hispanic                  | 10,318 (4.9)   | 4.30 (4.21 – 4.39)         | 2,303 (4.5)   | 0.84 (0.80 – 0.87)         |
| Other <sup>b</sup>        | 4,445 (2.1)    | 3.36 (3.26 – 3.46)         | 1,258 (2.5)   | 0.81 (0.77 – 0.86)         |
| Age at diagnosis, y       |                |                            |               |                            |
| <45                       | 10,019 (4.8)   | 0.70 (0.68 – 0.71)         | 2,817 (5.5)   | 0.19 (0.19 – 0.20)         |
| 45-54                     | 51,456 (24.6)  | 14.24 (14.12 – 14.37)      | 10,118 (19.9) | 2.71 (2.66 – 2.76)         |
| 55-64                     | 78,761 (37.6)  | 27.88 (27.69 – 28.08)      | 15,703 (30.9) | 5.17 (5.09 – 5.25)         |
| 65-74                     | 48,442 (23.1)  | 27.61 (27.37 – 27.86)      | 12,925 (25.4) | 6.43 (6.32 – 6.54)         |
| 75-84                     | 17,542 (8.4)   | 18.78 (18.51 – 19.06)      | 7,204 (14.2)  | 5.57 (5.44 – 5.70)         |
| 85+                       | 3,077 (1.5)    | 10.44 (10.08 – 10.82)      | 2,118 (4.2)   | 3.47 (3.32 – 3.62)         |
| Stage at diagnosis        |                |                            |               |                            |
| Localized                 | 27,621 (13.2)  | 1.03 (1.02 – 1.04)         | 10,949 (21.5) | 0.36 (0.35 – 0.37)         |
| Regional                  | 138,911 (66.4) | 5.04 (5.01 – 5.06)         | 29,763 (58.5) | 0.98 (0.97 – 0.99)         |
| Distant                   | 33,699 (16.1)  | 1.23 (1.21 – 1.24)         | 7,415 (14.6)  | 0.24 (0.24 – 0.25)         |
| Unknown                   | 9,066 (4.3)    | 0.34 (0.33 – 0.35)         | 2,758 (5.4)   | 0.09 (0.09 – 0.09)         |
| US regions <sup>c</sup>   |                |                            |               |                            |
| Southeast                 | 67,689 (32.3)  | 8.91 (8.84 – 8.98)         | 16,299 (32)   | 1.91 (1.88 – 1.94)         |
| Southwest                 | 21,186 (10.1)  | 6.92 (6.82 – 7.01)         | 4,867 (9.6)   | 1.46 (1.42 – 1.5)          |
| Northeast                 | 36,970 (17.7)  | 7.16 (7.09 – 7.23)         | 9,806 (19.3)  | 1.66 (1.62 – 1.69)         |
| Midwest                   | 46,588 (22.3)  | 7.56 (7.49 – 7.63)         | 11,492 (22.6) | 1.69 (1.66 – 1.72)         |
| Rocky Mountain            | 7,737 (3.7)    | 6.65 (6.5 – 6.8)           | 1,737 (3.4)   | 1.44 (1.38 – 1.51)         |
| Pacific                   | 27,874 (13.3)  | 6.89 (6.81 – 6.97)         | 6,427 (12.6)  | 1.45 (1.41 – 1.48)         |
| Non-contiguous            | 1,253 (0.6)    | 6.53 (6.17 – 6.91)         | 257 (0.5)     | 1.31 (1.15 – 1.48)         |
| <b>SEER-18 Database</b>   |                |                            |               |                            |
| Overall                   | 49,764 (100)   | 6.92 (6.86 – 6.98)         | 12,012 (100)  | 1.50 (1.47 – 1.52)         |
| Tumor size                |                |                            |               |                            |
| ≤1                        | 2,626 (5.3)    | 0.36 (0.35 – 0.38)         | 825 (6.9)     | 0.10 (0.10 – 0.11)         |
| >1 to ≤2                  | 7,438 (14.9)   | 1.03 (1.00 – 1.05)         | 2,029 (16.9)  | 0.25 (0.24 – 0.27)         |
| >2 to ≤4                  | 17,685 (35.5)  | 2.46 (2.42 – 2.50)         | 3,957 (32.9)  | 0.49 (0.48 – 0.51)         |
| >4                        | 7,753 (15.6)   | 1.08 (1.06 – 1.11)         | 1,503 (12.5)  | 0.19 (0.18 – 0.20)         |
| Unknown                   | 13,697 (27.5)  | 1.91 (1.88 – 1.94)         | 3,548 (29.5)  | 0.44 (0.43 – 0.46)         |

Abbreviations: NPCR, National Program of Cancer Registries; SEER, Surveillance Epidemiology, and End Results program

<sup>a</sup> Rates were calculated as number of cases per 100 000 person-year and age-adjusted to the 2000 US standard population.

<sup>b</sup> Others include Asian/Pacific Islander, American Indian/Alaskan Native, and other.

<sup>c</sup> Southeast: Alabama, Arkansas, Delaware, District of Columbia, Florida, Georgia, Kentucky, Louisiana, Maryland, Mississippi, North Carolina, South Carolina, Tennessee, Virginia, West Virginia; Southwest: Arizona, New Mexico, Oklahoma, Texas; Northeast: Connecticut, Maine, Massachusetts, New Hampshire, New Jersey, New York, Pennsylvania, Rhode Island, Vermont; Midwest: Illinois, Indiana, Iowa, Kansas, Michigan, Minnesota, Missouri, Nebraska, North Dakota, Ohio, South Dakota, Wisconsin; Rocky Mountain: Colorado, Idaho, Montana, Nevada, Utah, Wyoming; Pacific: California, Oregon, Washington; Non-contiguous: Alaska, Hawaii

**eTable 2.** Overall and Sex, Race and SEER Summary Stage specific Oropharyngeal Squamous cell carcinoma Incidence Rates<sup>a</sup> During 2001-2017 in the United States

| Year of diagnosis | Overall   |      | Sex       |      |           |      | Race/Ethnicity     |      |                    |      |           |      |                    |      | SEER Summary Stage |      |           |      |           |      |           |      |
|-------------------|-----------|------|-----------|------|-----------|------|--------------------|------|--------------------|------|-----------|------|--------------------|------|--------------------|------|-----------|------|-----------|------|-----------|------|
|                   |           |      | Male      |      | Female    |      | Non-Hispanic White |      | Non-Hispanic Black |      | Hispanic  |      | Other <sup>b</sup> |      | Localized          |      | Regional  |      | Distant   |      | Unknown   |      |
|                   | No. cases | Rate | No. cases | Rate | No. cases | Rate | No. cases          | Rate | No. cases          | Rate | No. cases | Rate | No. cases          | Rate | No. cases          | Rate | No. cases | Rate | No. cases | Rate | No. cases | Rate |
| 2001              | 10,177    | 3.60 | 7,771     | 5.90 | 2,406     | 1.58 | 8,253              | 3.71 | 1,262              | 4.60 | 480       | 2.45 | 182                | 1.61 | 2,045              | 0.73 | 6,480     | 2.29 | 933       | 0.33 | 719       | 0.25 |
| 2002              | 10,690    | 3.69 | 8,293     | 6.12 | 2,397     | 1.55 | 8,734              | 3.86 | 1,298              | 4.61 | 473       | 2.30 | 185                | 1.54 | 1,971              | 0.68 | 7,003     | 2.41 | 1,015     | 0.35 | 701       | 0.24 |
| 2003              | 11,334    | 3.83 | 8,815     | 6.35 | 2,519     | 1.59 | 9,307              | 4.04 | 1,288              | 4.43 | 530       | 2.40 | 209                | 1.67 | 2,080              | 0.71 | 7,412     | 2.50 | 1,077     | 0.36 | 765       | 0.26 |
| 2004              | 11,877    | 3.92 | 9,455     | 6.62 | 2,422     | 1.51 | 9,730              | 4.16 | 1,360              | 4.51 | 552       | 2.37 | 235                | 1.76 | 1,954              | 0.65 | 7,160     | 2.35 | 2,174     | 0.72 | 589       | 0.20 |
| 2005              | 12,253    | 3.94 | 9,574     | 6.53 | 2,679     | 1.64 | 10,178             | 4.26 | 1,274              | 4.10 | 550       | 2.22 | 251                | 1.77 | 1,990              | 0.65 | 7,414     | 2.38 | 2,303     | 0.74 | 546       | 0.18 |
| 2006              | 12,650    | 3.97 | 9,957     | 6.61 | 2,693     | 1.61 | 10,553             | 4.34 | 1,253              | 3.93 | 595       | 2.26 | 249                | 1.71 | 2,016              | 0.64 | 7,712     | 2.41 | 2,316     | 0.72 | 606       | 0.19 |
| 2007              | 13,685    | 4.20 | 10,914    | 7.09 | 2,771     | 1.62 | 11,409             | 4.61 | 1,377              | 4.22 | 635       | 2.33 | 264                | 1.71 | 2,177              | 0.68 | 8,367     | 2.56 | 2,566     | 0.79 | 575       | 0.18 |
| 2008              | 14,670    | 4.39 | 11,748    | 7.42 | 2,922     | 1.67 | 12,325             | 4.89 | 1,416              | 4.16 | 647       | 2.25 | 282                | 1.75 | 2,235              | 0.68 | 9,100     | 2.72 | 2,749     | 0.82 | 586       | 0.18 |
| 2009              | 15,280    | 4.47 | 12,332    | 7.61 | 2,948     | 1.65 | 12,806             | 5.00 | 1,417              | 4.04 | 754       | 2.52 | 303                | 1.78 | 2,230              | 0.68 | 9,528     | 2.78 | 2,819     | 0.82 | 703       | 0.21 |
| 2010              | 15,686    | 4.48 | 12,558    | 7.54 | 3,128     | 1.72 | 13,148             | 5.04 | 1,411              | 3.96 | 758       | 2.37 | 369                | 2.14 | 2,295              | 0.67 | 10,035    | 2.85 | 2,660     | 0.76 | 696       | 0.20 |
| 2011              | 16,862    | 4.71 | 13,567    | 7.98 | 3,295     | 1.77 | 14,155             | 5.34 | 1,493              | 4.05 | 819       | 2.50 | 395                | 2.14 | 2,353              | 0.67 | 10,922    | 3.03 | 2,921     | 0.82 | 666       | 0.19 |
| 2012              | 17,210    | 4.71 | 13,942    | 8.03 | 3,268     | 1.71 | 14,560             | 5.40 | 1,436              | 3.78 | 833       | 2.37 | 381                | 2.00 | 2,413              | 0.67 | 11,101    | 3.02 | 3,043     | 0.84 | 653       | 0.18 |
| 2013              | 18,214    | 4.88 | 14,812    | 8.36 | 3,402     | 1.75 | 15,393             | 5.63 | 1,503              | 3.86 | 862       | 2.35 | 456                | 2.28 | 2,458              | 0.67 | 11,825    | 3.16 | 3,297     | 0.88 | 624       | 0.17 |
| 2014              | 19,111    | 5.02 | 15,667    | 8.66 | 3,444     | 1.74 | 16,146             | 5.83 | 1,537              | 3.84 | 955       | 2.49 | 473                | 2.24 | 2,576              | 0.68 | 12,450    | 3.26 | 3,396     | 0.89 | 689       | 0.18 |
| 2015              | 19,606    | 5.04 | 16,046    | 8.68 | 3,560     | 1.77 | 16,728             | 5.95 | 1,475              | 3.58 | 973       | 2.46 | 430                | 1.97 | 2,524              | 0.65 | 12,966    | 3.34 | 3,510     | 0.90 | 606       | 0.16 |
| 2016              | 20,436    | 5.16 | 16,931    | 9.01 | 3,505     | 1.70 | 17,230             | 6.05 | 1,598              | 3.77 | 1,107     | 2.67 | 501                | 2.19 | 2,643              | 0.67 | 14,405    | 3.64 | 2,301     | 0.58 | 1,087     | 0.28 |
| 2017              | 20,441    | 5.08 | 16,915    | 8.88 | 3,526     | 1.67 | 17,301             | 6.03 | 1,504              | 3.53 | 1,098     | 2.55 | 538                | 2.25 | 2,610              | 0.65 | 14,794    | 3.68 | 2,034     | 0.50 | 1,003     | 0.25 |

<sup>a</sup> Rates were calculated as number of cases per 100 000 person-year and age-adjusted to the 2000 US standard population.

<sup>b</sup> Others include Asian/Pacific Islander, American Indian/Alaskan Native, and other.

**eTable 3.** Sex and race-stratified oropharyngeal carcinoma incidence rates<sup>a</sup> over calendar year during 2001-2017 in the United States

| Year of diagnosis | Sex                |       |                    |      |           |      |                    |      |                    |      |                    |      |           |      |                    |      |
|-------------------|--------------------|-------|--------------------|------|-----------|------|--------------------|------|--------------------|------|--------------------|------|-----------|------|--------------------|------|
|                   | Male               |       |                    |      |           |      |                    |      | Female             |      |                    |      |           |      |                    |      |
|                   | Non-Hispanic white |       | Non-Hispanic Black |      | Hispanic  |      | Other <sup>b</sup> |      | Non-Hispanic white |      | Non-Hispanic Black |      | Hispanic  |      | Other <sup>b</sup> |      |
|                   | No. cases          | Rate  | No. cases          | Rate | No. cases | Rate | No. cases          | Rate | No. cases          | Rate | No. cases          | Rate | No. cases | Rate | No. cases          | Rate |
| 2001              | 6,273              | 6.00  | 974                | 8.14 | 392       | 4.32 | 132                | 2.53 | 1,980              | 1.64 | 288                | 1.88 | 88        | 0.89 | 50                 | 0.85 |
| 2002              | 6,722              | 6.29  | 1,021              | 8.34 | 400       | 4.28 | 150                | 2.73 | 2,012              | 1.65 | 277                | 1.76 | 73        | 0.67 | 35                 | 0.56 |
| 2003              | 7,222              | 6.63  | 997                | 7.81 | 436       | 4.34 | 160                | 2.76 | 2,085              | 1.70 | 291                | 1.82 | 94        | 0.79 | 49                 | 0.77 |
| 2004              | 7,739              | 6.94  | 1,081              | 8.20 | 454       | 4.19 | 181                | 2.95 | 1,991              | 1.61 | 279                | 1.67 | 98        | 0.82 | 54                 | 0.77 |
| 2005              | 7,944              | 6.98  | 991                | 7.31 | 451       | 3.98 | 188                | 2.89 | 2,234              | 1.77 | 283                | 1.63 | 99        | 0.76 | 63                 | 0.83 |
| 2006              | 8,329              | 7.17  | 969                | 6.87 | 468       | 3.82 | 191                | 2.93 | 2,224              | 1.74 | 284                | 1.62 | 127       | 0.92 | 58                 | 0.73 |
| 2007              | 9,121              | 7.71  | 1,064              | 7.49 | 523       | 4.13 | 206                | 2.96 | 2,288              | 1.76 | 313                | 1.75 | 112       | 0.80 | 58                 | 0.68 |
| 2008              | 9,873              | 8.18  | 1,124              | 7.52 | 526       | 3.95 | 225                | 3.06 | 2,452              | 1.86 | 292                | 1.55 | 121       | 0.82 | 57                 | 0.67 |
| 2009              | 10,360             | 8.42  | 1,095              | 7.06 | 632       | 4.69 | 245                | 3.15 | 2,446              | 1.84 | 322                | 1.67 | 122       | 0.73 | 58                 | 0.64 |
| 2010              | 10,589             | 8.43  | 1,084              | 7.02 | 595       | 4.01 | 290                | 3.71 | 2,559              | 1.90 | 327                | 1.64 | 163       | 0.97 | 79                 | 0.86 |
| 2011              | 11,430             | 8.95  | 1,171              | 7.29 | 668       | 4.41 | 298                | 3.54 | 2,725              | 1.98 | 322                | 1.57 | 151       | 0.88 | 97                 | 0.97 |
| 2012              | 11,837             | 9.14  | 1,122              | 6.75 | 691       | 4.23 | 292                | 3.36 | 2,723              | 1.95 | 314                | 1.49 | 142       | 0.77 | 89                 | 0.87 |
| 2013              | 12,599             | 9.57  | 1,173              | 6.87 | 693       | 4.10 | 347                | 3.76 | 2,794              | 1.97 | 330                | 1.53 | 169       | 0.87 | 109                | 1.05 |
| 2014              | 13,277             | 9.97  | 1,223              | 6.93 | 785       | 4.45 | 382                | 4.00 | 2,869              | 2.00 | 314                | 1.43 | 170       | 0.83 | 91                 | 0.80 |
| 2015              | 13,777             | 10.16 | 1,157              | 6.40 | 783       | 4.28 | 329                | 3.28 | 2,951              | 2.05 | 318                | 1.39 | 190       | 0.92 | 101                | 0.87 |
| 2016              | 14,332             | 10.46 | 1,273              | 6.82 | 927       | 4.85 | 399                | 3.82 | 2,898              | 1.96 | 325                | 1.40 | 180       | 0.81 | 102                | 0.83 |
| 2017              | 14,390             | 10.42 | 1,201              | 6.47 | 894       | 4.50 | 430                | 3.93 | 2,911              | 1.95 | 303                | 1.26 | 204       | 0.89 | 108                | 0.85 |

<sup>a</sup> Rates were calculated as number of cases per 100 000 person-year and age-adjusted to the 2000 US standard population.

<sup>b</sup> Others include Asian/Pacific Islander, American Indian/Alaskan Native, and other.

**eTable 4.** Age-specific oropharyngeal cancer incidence rates<sup>a</sup> over calendar year during 2001-2017 among men in the United States

| Year of diagnosis | <45       |      | 45-54     |       | 55-64     |       | 65-74     |       | 75-84     |       | 85+       |       |
|-------------------|-----------|------|-----------|-------|-----------|-------|-----------|-------|-----------|-------|-----------|-------|
|                   | No. cases | Rate | No. cases | Rate  | No. cases | Rate  | No. cases | Rate  | No. cases | Rate  | No. cases | Rate  |
| <b>2001</b>       | 590       | 0.66 | 2,373     | 12.34 | 2,337     | 19.58 | 1,662     | 20.12 | 700       | 14.07 | 109       | 8.72  |
| <b>2002</b>       | 620       | 0.69 | 2,504     | 12.87 | 2,676     | 21.06 | 1,626     | 19.59 | 758       | 14.97 | 109       | 8.51  |
| <b>2003</b>       | 621       | 0.70 | 2,653     | 13.36 | 2,860     | 21.43 | 1,798     | 21.41 | 762       | 14.82 | 121       | 9.12  |
| <b>2004</b>       | 650       | 0.74 | 2,830     | 13.96 | 3,193     | 22.83 | 1,874     | 22.05 | 800       | 15.39 | 108       | 7.89  |
| <b>2005</b>       | 619       | 0.71 | 2,791     | 13.46 | 3,442     | 23.59 | 1,751     | 20.29 | 852       | 16.20 | 119       | 8.31  |
| <b>2006</b>       | 641       | 0.74 | 2,843     | 13.44 | 3,644     | 23.92 | 1,931     | 21.92 | 767       | 14.47 | 131       | 8.69  |
| <b>2007</b>       | 633       | 0.74 | 3,054     | 14.16 | 4,012     | 25.36 | 2,184     | 24.13 | 877       | 16.46 | 154       | 9.74  |
| <b>2008</b>       | 642       | 0.76 | 3,171     | 14.47 | 4,453     | 27.28 | 2,369     | 24.93 | 955       | 17.82 | 158       | 9.57  |
| <b>2009</b>       | 640       | 0.77 | 3,238     | 14.61 | 4,729     | 27.93 | 2,619     | 26.71 | 947       | 17.68 | 159       | 9.23  |
| <b>2010</b>       | 569       | 0.69 | 3,239     | 14.50 | 4,940     | 28.08 | 2,636     | 25.95 | 989       | 18.23 | 185       | 10.30 |
| <b>2011</b>       | 613       | 0.74 | 3,285     | 14.69 | 5,353     | 29.36 | 3,050     | 29.02 | 1,075     | 19.59 | 191       | 10.21 |
| <b>2012</b>       | 548       | 0.66 | 3,280     | 14.80 | 5,466     | 29.60 | 3,311     | 29.55 | 1,113     | 19.96 | 224       | 11.48 |
| <b>2013</b>       | 559       | 0.68 | 3,238     | 14.73 | 5,843     | 31.10 | 3,743     | 31.62 | 1,193     | 21.02 | 236       | 11.69 |
| <b>2014</b>       | 535       | 0.66 | 3,383     | 15.46 | 6,226     | 32.51 | 3,967     | 32.16 | 1,298     | 22.31 | 258       | 12.36 |
| <b>2015</b>       | 492       | 0.61 | 3,265     | 15.04 | 6,332     | 32.40 | 4,350     | 33.76 | 1,360     | 22.84 | 247       | 11.48 |
| <b>2016</b>       | 521       | 0.65 | 3,173     | 14.77 | 6,666     | 33.56 | 4,759     | 35.53 | 1,560     | 25.47 | 252       | 11.39 |
| <b>2017</b>       | 526       | 0.66 | 3,136     | 14.78 | 6,589     | 32.70 | 4,812     | 34.89 | 1,536     | 24.16 | 316       | 13.96 |

<sup>a</sup> Rates were calculated as number of cases per 100 000 person-year and age-adjusted to the 2000 US standard population.

**eTable 5.** Age-specific oropharyngeal cancer incidence rates<sup>a</sup> over calendar year during 2001-2017 among Women in the United States

| Year of diagnosis | <45       |      | 45-54     |      | 55-64     |      | 65-74     |      | 75-84     |      | 85+       |      |
|-------------------|-----------|------|-----------|------|-----------|------|-----------|------|-----------|------|-----------|------|
|                   | No. cases | Rate |
| <b>2001</b>       | 179       | 0.20 | 467       | 2.34 | 590       | 4.57 | 625       | 6.28 | 443       | 5.93 | 102       | 3.38 |
| <b>2002</b>       | 162       | 0.18 | 439       | 2.17 | 648       | 4.74 | 670       | 6.76 | 400       | 5.30 | 78        | 2.56 |
| <b>2003</b>       | 202       | 0.22 | 506       | 2.45 | 689       | 4.80 | 610       | 6.13 | 396       | 5.21 | 116       | 3.74 |
| <b>2004</b>       | 172       | 0.19 | 538       | 2.56 | 674       | 4.49 | 586       | 5.86 | 370       | 4.88 | 82        | 2.61 |
| <b>2005</b>       | 169       | 0.19 | 591       | 2.75 | 729       | 4.66 | 676       | 6.70 | 406       | 5.40 | 108       | 3.36 |
| <b>2006</b>       | 188       | 0.21 | 583       | 2.66 | 797       | 4.88 | 616       | 6.02 | 392       | 5.14 | 117       | 3.53 |
| <b>2007</b>       | 171       | 0.20 | 606       | 2.71 | 834       | 4.91 | 634       | 6.05 | 398       | 5.33 | 128       | 3.75 |
| <b>2008</b>       | 179       | 0.21 | 612       | 2.70 | 881       | 5.02 | 692       | 6.36 | 422       | 5.63 | 136       | 3.88 |
| <b>2009</b>       | 172       | 0.20 | 632       | 2.76 | 914       | 5.02 | 691       | 6.18 | 407       | 5.45 | 132       | 3.67 |
| <b>2010</b>       | 183       | 0.22 | 719       | 3.11 | 940       | 4.98 | 732       | 6.28 | 425       | 5.66 | 129       | 3.49 |
| <b>2011</b>       | 170       | 0.20 | 683       | 2.96 | 1,073     | 5.48 | 789       | 6.64 | 445       | 5.96 | 135       | 3.57 |
| <b>2012</b>       | 145       | 0.17 | 645       | 2.82 | 1,053     | 5.30 | 867       | 6.82 | 415       | 5.57 | 143       | 3.69 |
| <b>2013</b>       | 150       | 0.18 | 665       | 2.91 | 1,102     | 5.45 | 893       | 6.70 | 453       | 6.02 | 139       | 3.53 |
| <b>2014</b>       | 130       | 0.15 | 665       | 2.94 | 1,078     | 5.24 | 955       | 6.87 | 473       | 6.18 | 143       | 3.56 |
| <b>2015</b>       | 157       | 0.19 | 658       | 2.95 | 1,232     | 5.89 | 898       | 6.21 | 462       | 5.95 | 153       | 3.76 |
| <b>2016</b>       | 157       | 0.19 | 560       | 2.53 | 1,215     | 5.71 | 1,002     | 6.68 | 426       | 5.35 | 145       | 3.52 |
| <b>2017</b>       | 131       | 0.16 | 549       | 2.52 | 1,254     | 5.80 | 989       | 6.32 | 471       | 5.75 | 132       | 3.18 |

<sup>a</sup> Rates were calculated as number of cases per 100 000 person-year and age-adjusted to the 2000 US standard population

**eTable 6.** Oropharyngeal cancer incidence rates<sup>a</sup> during 2001-2017 according to SEER summary stage at diagnosis among men in the United States

| Year of diagnosis | SEER Summary Stage 2000 |            |      |           |            |      |           |            |      |           |            |      |
|-------------------|-------------------------|------------|------|-----------|------------|------|-----------|------------|------|-----------|------------|------|
|                   | Localized               |            |      | Regional  |            |      | Distant   |            |      | Unknown   |            |      |
|                   | No. cases               | Proportion | Rate | No. cases | Proportion | Rate | No. cases | Proportion | Rate | No. cases | Proportion | Rate |
| 2001              | 1,446                   | 18.6       | 1.12 | 5,078     | 65.3       | 3.82 | 725       | 9.3        | 0.55 | 522       | 6.7        | 0.40 |
| 2002              | 1,365                   | 16.5       | 1.03 | 5,586     | 67.4       | 4.09 | 812       | 9.8        | 0.60 | 530       | 6.4        | 0.40 |
| 2003              | 1,475                   | 16.7       | 1.09 | 5,912     | 67.1       | 4.22 | 850       | 9.6        | 0.62 | 578       | 6.6        | 0.42 |
| 2004              | 1,412                   | 14.9       | 1.01 | 5,830     | 61.7       | 4.05 | 1,758     | 18.6       | 1.23 | 455       | 4.8        | 0.33 |
| 2005              | 1,369                   | 14.3       | 0.96 | 5,954     | 62.2       | 4.02 | 1,852     | 19.3       | 1.26 | 399       | 4.2        | 0.28 |
| 2006              | 1,419                   | 14.3       | 0.97 | 6,219     | 62.5       | 4.10 | 1,865     | 18.7       | 1.23 | 454       | 4.6        | 0.31 |
| 2007              | 1,572                   | 14.4       | 1.06 | 6,848     | 62.7       | 4.41 | 2,065     | 18.9       | 1.34 | 429       | 3.9        | 0.29 |
| 2008              | 1,578                   | 13.4       | 1.02 | 7,460     | 63.5       | 4.68 | 2,256     | 19.2       | 1.42 | 454       | 3.9        | 0.30 |
| 2009              | 1,581                   | 12.8       | 1.01 | 7,882     | 63.9       | 4.83 | 2,329     | 18.9       | 1.43 | 540       | 4.4        | 0.34 |
| 2010              | 1,593                   | 12.7       | 0.99 | 8,275     | 65.9       | 4.94 | 2,155     | 17.2       | 1.29 | 535       | 4.3        | 0.33 |
| 2011              | 1,672                   | 12.3       | 1.01 | 8,979     | 66.2       | 5.23 | 2,402     | 17.7       | 1.42 | 514       | 3.8        | 0.31 |
| 2012              | 1,727                   | 12.4       | 1.03 | 9,165     | 65.7       | 5.24 | 2,536     | 18.2       | 1.47 | 514       | 3.7        | 0.30 |
| 2013              | 1,789                   | 12.1       | 1.03 | 9,814     | 66.3       | 5.51 | 2,715     | 18.3       | 1.53 | 494       | 3.3        | 0.29 |
| 2014              | 1,852                   | 11.8       | 1.05 | 10,435    | 66.6       | 5.74 | 2,852     | 18.2       | 1.58 | 528       | 3.4        | 0.30 |
| 2015              | 1,847                   | 11.5       | 1.02 | 10,837    | 67.5       | 5.85 | 2,902     | 18.1       | 1.56 | 460       | 2.9        | 0.25 |
| 2016              | 1,987                   | 11.7       | 1.08 | 12,174    | 71.9       | 6.45 | 1,902     | 11.2       | 1.01 | 868       | 5.1        | 0.47 |
| 2017              | 1,937                   | 11.5       | 1.04 | 12,463    | 73.7       | 6.52 | 1,723     | 10.2       | 0.90 | 792       | 4.7        | 0.42 |

Abbreviations: SEER, Surveillance Epidemiology, and End Results Program

<sup>a</sup>Rates were calculated as number of cases per 100 000 person-year and age-adjusted to the 2000 US standard population.

**eTable 7.** Oropharyngeal squamous cell carcinoma incidence rates<sup>a</sup> During 2001-2017 according to SEER Summary Stage at Diagnosis among Women

| Year of diagnosis | SEER Summary Stage 2000 |            |      |           |            |      |           |            |      |           |            |      |
|-------------------|-------------------------|------------|------|-----------|------------|------|-----------|------------|------|-----------|------------|------|
|                   | Localized               |            |      | Regional  |            |      | Distant   |            |      | Unknown   |            |      |
|                   | No. cases               | Proportion | Rate | No. cases | Proportion | Rate | No. cases | Proportion | Rate | No. cases | Proportion | Rate |
| 2001              | 599                     | 24.9       | 0.39 | 1,402     | 58.3       | 0.92 | 208       | 8.6        | 0.14 | 197       | 8.2        | 0.13 |
| 2002              | 606                     | 25.3       | 0.39 | 1,417     | 59.1       | 0.92 | 203       | 8.5        | 0.13 | 171       | 7.1        | 0.11 |
| 2003              | 605                     | 24.0       | 0.38 | 1,500     | 59.5       | 0.95 | 227       | 9.0        | 0.14 | 187       | 7.4        | 0.12 |
| 2004              | 542                     | 22.4       | 0.34 | 1,330     | 54.9       | 0.83 | 416       | 17.2       | 0.26 | 134       | 5.5        | 0.08 |
| 2005              | 621                     | 23.2       | 0.38 | 1,460     | 54.5       | 0.90 | 451       | 16.8       | 0.28 | 147       | 5.5        | 0.09 |
| 2006              | 597                     | 22.2       | 0.36 | 1,493     | 55.4       | 0.89 | 451       | 16.7       | 0.27 | 152       | 5.6        | 0.09 |
| 2007              | 605                     | 21.8       | 0.35 | 1,519     | 54.8       | 0.89 | 501       | 18.1       | 0.29 | 146       | 5.3        | 0.08 |
| 2008              | 657                     | 22.5       | 0.37 | 1,640     | 56.1       | 0.94 | 493       | 16.9       | 0.28 | 132       | 4.5        | 0.08 |
| 2009              | 649                     | 22.0       | 0.36 | 1,646     | 55.8       | 0.92 | 490       | 16.6       | 0.27 | 163       | 5.5        | 0.09 |
| 2010              | 702                     | 22.4       | 0.39 | 1,760     | 56.3       | 0.97 | 505       | 16.1       | 0.28 | 161       | 5.1        | 0.09 |
| 2011              | 681                     | 20.7       | 0.37 | 1,943     | 59.0       | 1.04 | 519       | 15.8       | 0.28 | 152       | 4.6        | 0.08 |
| 2012              | 686                     | 21.0       | 0.36 | 1,936     | 59.2       | 1.01 | 507       | 15.5       | 0.27 | 139       | 4.3        | 0.07 |
| 2013              | 669                     | 19.7       | 0.34 | 2,011     | 59.1       | 1.03 | 582       | 17.1       | 0.30 | 140       | 4.1        | 0.07 |
| 2014              | 724                     | 21.0       | 0.37 | 2,015     | 58.5       | 1.02 | 544       | 15.8       | 0.27 | 161       | 4.7        | 0.08 |
| 2015              | 677                     | 19.0       | 0.33 | 2,129     | 59.8       | 1.06 | 608       | 17.1       | 0.30 | 146       | 4.1        | 0.07 |
| 2016              | 656                     | 18.7       | 0.32 | 2,231     | 63.7       | 1.09 | 399       | 11.4       | 0.19 | 219       | 6.2        | 0.11 |
| 2017              | 673                     | 19.1       | 0.32 | 2,331     | 66.1       | 1.11 | 311       | 8.8        | 0.15 | 211       | 6.0        | 0.10 |

Abbreviations: SEER, Surveillance Epidemiology, and End Results Program

<sup>a</sup> Rates were calculated as number of cases per 100 000 person-year and age-adjusted to the 2000 US standard population



**eTable 8.** Rate ratios for oropharyngeal cancer incidence rates<sup>a</sup> over calendar year during 2001-2017 among men in the United States

| Age Group                 | 2001-2003 |                   | 2015-2017 |                   | Rate Ratio <sup>b</sup> | 95% CI        |
|---------------------------|-----------|-------------------|-----------|-------------------|-------------------------|---------------|
|                           | No. Cases | Rate <sup>a</sup> | No. Cases | Rate <sup>a</sup> |                         |               |
| <b>Non-Hispanic White</b> |           |                   |           |                   |                         |               |
| 25-29                     | 28        | 0.16              | 18        | 0.09              | 0.56                    | (0.29 - 1.05) |
| 30-34                     | 74        | 0.37              | 58        | 0.31              | 0.82                    | (0.57 - 1.18) |
| 35-39                     | 288       | 1.32              | 229       | 1.28              | 0.97                    | (0.81 - 1.16) |
| 40-44                     | 1075      | 4.44              | 841       | 4.85              | 1.09                    | (1 - 1.2)     |
| 45-49                     | 2471      | 10.67             | 2613      | 13.38             | 1.25                    | (1.19 - 1.33) |
| 50-54                     | 3574      | 16.98             | 5428      | 25.25             | 1.49                    | (1.43 - 1.55) |
| 55-59                     | 3487      | 20.41             | 8109      | 35.90             | 1.76                    | (1.69 - 1.83) |
| 60-64                     | 2894      | 22.02             | 8652      | 42.03             | 1.91                    | (1.83 - 1.99) |
| 65-69                     | 2289      | 21.23             | 7410      | 41.37             | 1.95                    | (1.86 - 2.04) |
| 70-74                     | 1844      | 19.12             | 4631      | 35.42             | 1.85                    | (1.75 - 1.96) |
| 75-79                     | 1254      | 15.94             | 2551      | 28.87             | 1.81                    | (1.69 - 1.94) |
| 80-84                     | 640       | 12.42             | 1256      | 21.32             | 1.72                    | (1.56 - 1.89) |
| 85+                       | 291       | 8.67              | 690       | 12.72             | 1.47                    | (1.28 - 1.69) |
| <b>Non-Hispanic Black</b> |           |                   |           |                   |                         |               |
| 25-29                     | -         | -                 | -         | -                 | -                       | -             |
| 30-34                     | -         | -                 | -         | -                 | -                       | -             |
| 35-39                     | 48        | 1.26              | 38        | 1.00              | 0.79                    | (0.5 - 1.23)  |
| 40-44                     | 141       | 3.67              | 115       | 3.26              | 0.89                    | (0.69 - 1.14) |
| 45-49                     | 400       | 11.91             | 257       | 7.06              | 0.59                    | (0.5 - 0.7)   |
| 50-54                     | 588       | 21.31             | 474       | 12.72             | 0.60                    | (0.53 - 0.67) |
| 55-59                     | 543       | 28.09             | 725       | 20.47             | 0.73                    | (0.65 - 0.82) |
| 60-64                     | 436       | 29.85             | 739       | 26.04             | 0.87                    | (0.77 - 0.98) |
| 65-69                     | 367       | 31.62             | 582       | 27.62             | 0.87                    | (0.77 - 1)    |
| 70-74                     | 256       | 29.24             | 361       | 27.09             | 0.93                    | (0.79 - 1.09) |
| 75-79                     | 118       | 18.79             | 182       | 21.11             | 1.12                    | (0.89 - 1.43) |
| 80-84                     | 62        | 17.10             | 97        | 18.56             | 1.09                    | (0.78 - 1.52) |
| 85+                       | 18        | 7.66              | 48        | 11.53             | 1.51                    | (0.86 - 2.75) |
| <b>Hispanic</b>           |           |                   |           |                   |                         |               |
| 25-29                     | -         | -                 | -         | -                 | -                       | -             |
| 30-34                     | -         | -                 | -         | -                 | -                       | -             |
| 35-39                     | 25        | 0.53              | 41        | 0.62              | 1.17                    | (0.7 - 2.01)  |
| 40-44                     | 69        | 1.73              | 97        | 1.61              | 0.93                    | (0.68 - 1.29) |
| 45-49                     | 130       | 4.25              | 208       | 3.85              | 0.90                    | (0.72 - 1.13) |
| 50-54                     | 228       | 9.90              | 359       | 7.71              | 0.78                    | (0.66 - 0.92) |
| 55-59                     | 196       | 12.13             | 459       | 12.34             | 1.02                    | (0.86 - 1.21) |
| 60-64                     | 186       | 16.10             | 465       | 16.94             | 1.05                    | (0.89 - 1.25) |
| 65-69                     | 134       | 15.24             | 392       | 19.93             | 1.31                    | (1.07 - 1.6)  |
| 70-74                     | 119       | 17.67             | 243       | 18.88             | 1.07                    | (0.85 - 1.34) |
| 75-79                     | 74        | 16.08             | 165       | 19.43             | 1.21                    | (0.91 - 1.61) |
| 80-84                     | 33        | 13.11             | 102       | 18.78             | 1.43                    | (0.96 - 2.19) |
| 85+                       | 23        | 14.34             | 61        | 12.62             | 0.88                    | (0.54 - 1.49) |

<sup>a</sup> Rates were calculated as number of cases per 100 000 person-years and age adjusted to the 2000 US standard population.

<sup>b</sup> Rate ratios are calculated taking 2001-2003 incidence rates as reference points

- Statistic not displayed due to fewer than 16 cases.

**eTable 9.** Rate ratios for oropharyngeal cancer incidence rates<sup>a</sup> during 2001-2017 among Women

| Age Group                 | 2001-2003 |                   | 2015-2017 |                   | Rate Ratio <sup>b</sup> | 95% CI        |
|---------------------------|-----------|-------------------|-----------|-------------------|-------------------------|---------------|
|                           | No. Cases | Rate <sup>a</sup> | No. Cases | Rate <sup>a</sup> |                         |               |
| <b>Non-Hispanic White</b> |           |                   |           |                   |                         |               |
| 25-29                     | -         | -                 | 18        | 0.09              | -                       | -             |
| 30-34                     | 49        | 0.25              | 39        | 0.21              | 0.84                    | (0.54 - 1.31) |
| 35-39                     | 94        | 0.43              | 84        | 0.48              | 1.10                    | (0.81 - 1.5)  |
| 40-44                     | 237       | 0.98              | 173       | 1.01              | 1.03                    | (0.84 - 1.26) |
| 45-49                     | 467       | 2.00              | 474       | 2.43              | 1.22                    | (1.07 - 1.39) |
| 50-54                     | 645       | 3.00              | 934       | 4.27              | 1.42                    | (1.29 - 1.58) |
| 55-59                     | 767       | 4.32              | 1525      | 6.52              | 1.51                    | (1.38 - 1.65) |
| 60-64                     | 816       | 5.78              | 1504      | 6.88              | 1.19                    | (1.09 - 1.3)  |
| 65-69                     | 797       | 6.57              | 1378      | 7.09              | 1.08                    | (0.99 - 1.18) |
| 70-74                     | 820       | 7.00              | 1081      | 7.33              | 1.05                    | (0.96 - 1.15) |
| 75-79                     | 672       | 6.16              | 708       | 6.64              | 1.08                    | (0.97 - 1.2)  |
| 80-84                     | 430       | 5.11              | 458       | 5.77              | 1.13                    | (0.99 - 1.29) |
| 85+                       | 264       | 3.30              | 378       | 3.78              | 1.15                    | (0.98 - 1.35) |
| <b>Non-Hispanic Black</b> |           |                   |           |                   |                         |               |
| 25-29                     | -         | -                 | -         | -                 | -                       | -             |
| 30-34                     | -         | -                 | -         | -                 | -                       | -             |
| 35-39                     | -         | -                 | -         | -                 | -                       | -             |
| 40-44                     | 65        | 1.50              | 26        | 0.65              | 0.44                    | (0.27 - 0.7)  |
| 45-49                     | 89        | 2.32              | 57        | 1.39              | 0.60                    | (0.42 - 0.85) |
| 50-54                     | 134       | 4.15              | 135       | 3.19              | 0.77                    | (0.6 - 0.98)  |
| 55-59                     | 138       | 5.91              | 213       | 5.18              | 0.88                    | (0.7 - 1.09)  |
| 60-64                     | 126       | 6.83              | 175       | 5.03              | 0.74                    | (0.58 - 0.93) |
| 65-69                     | 96        | 6.20              | 130       | 4.76              | 0.77                    | (0.59 - 1.01) |
| 70-74                     | 91        | 7.04              | 88        | 4.77              | 0.68                    | (0.5 - 0.92)  |
| 75-79                     | 54        | 5.16              | 54        | 4.13              | 0.80                    | (0.54 - 1.19) |
| 80-84                     | 27        | 3.81              | 30        | 3.28              | 0.86                    | (0.5 - 1.51)  |
| 85+                       | -         | -                 | 18        | 1.83              | -                       | -             |
| <b>Hispanic</b>           |           |                   |           |                   |                         |               |
| 25-29                     | -         | -                 | -         | -                 | -                       | -             |
| 30-34                     | -         | -                 | -         | -                 | -                       | -             |
| 35-39                     | -         | -                 | -         | -                 | -                       | -             |
| 40-44                     | 24        | 0.63              | 30        | 0.51              | 0.81                    | (0.46 - 1.45) |
| 45-49                     | 23        | 0.76              | 42        | 0.80              | 1.06                    | (0.62 - 1.84) |
| 50-54                     | 28        | 1.17              | 75        | 1.62              | 1.39                    | (0.89 - 2.22) |
| 55-59                     | 22        | 1.24              | 89        | 2.31              | 1.86                    | (1.15 - 3.11) |
| 60-64                     | 29        | 2.18              | 92        | 3.04              | 1.40                    | (0.91 - 2.2)  |
| 65-69                     | 35        | 3.23              | 83        | 3.62              | 1.12                    | (0.75 - 1.72) |
| 70-74                     | 31        | 3.50              | 58        | 3.57              | 1.02                    | (0.65 - 1.63) |
| 75-79                     | 25        | 3.84              | 32        | 2.77              | 0.72                    | (0.41 - 1.27) |
| 80-84                     | -         | -                 | 33        | 4.08              | -                       | -             |
| 85+                       | -         | -                 | 16        | 1.89              | -                       | -             |

<sup>a</sup> Rates were calculated as number of cases per 100 000 person-years and age adjusted to the 2000 US standard population.

<sup>b</sup> Rate ratios are calculated taking 2001-2003 incidence rates as reference points

- Statistic not displayed due to fewer than 16 cases.

**eTable 10.** Trends in oropharyngeal cancer incidence rates<sup>a</sup> during 2001-2017 among men in the United States

|                                | Trend <sup>b</sup> |                        |         |                       |         |
|--------------------------------|--------------------|------------------------|---------|-----------------------|---------|
|                                |                    |                        |         | Overall (2001-2017)   |         |
|                                | Year               | APC (95% CI)           | P Value | AAPC (95% CI)         | P Value |
| <b>Men (Overall)</b>           | 2001-2017          | 2.71 (2.48 – 2.93)     | <0.001  | 2.71 (2.48 – 2.93)    | <0.001  |
| <b>Race/Ethnicity</b>          |                    |                        |         |                       |         |
| NHW                            | 2001-2014          | 3.89 (3.59 – 4.18)     | <0.001  | 3.48 (3.04 – 3.92)    | <0.001  |
|                                | 2014-2017          | 1.71 (-0.51 – 3.98)    | 0.120   |                       |         |
| NHB                            | 2001-2017          | -1.38 (-1.78 – -0.98)  | <0.001  | -1.38 (-1.78 – -0.98) | <0.001  |
| Hispanic                       | 2001-2017          | 0.62 (-0.01 – 1.26)    | 0.053   | 0.62 (-0.01 – 1.26)   | 0.053   |
| Other <sup>c</sup>             | 2001-2017          | 1.98 (1.22 – 2.74)     | <0.001  | 1.98 (1.22 – 2.74)    | <0.001  |
| <b>Age at diagnosis, y</b>     |                    |                        |         |                       |         |
| <45                            | 2001-2008          | 1.67 (0.13 – 3.23)     | 0.036   | -0.50 (-1.31 – 0.32)  | 0.230   |
|                                | 2008-2017          | -2.15 (-3.22 – -1.08)  | 0.001   |                       |         |
| 45-54                          | 2001-2014          | 1.36 (0.99 – 1.73)     | <0.001  | 0.83 (0.21 – 1.46)    | 0.009   |
|                                | 2014-2017          | -1.43 (-4.65 – 1.89)   | 0.361   |                       |         |
| 55-64                          | 2001-2014          | 3.72 (3.33 – 4.11)     | <0.001  | 3.10 (2.35 – 3.84)    | <0.001  |
|                                | 2014-2017          | 0.45 (-2.26 – 3.24)    | 0.726   |                       |         |
| 65-74                          | 2001-2017          | 4.09 (3.69 – 4.49)     | <0.001  | 4.09 (3.69 – 4.49)    | <0.001  |
| 75-84                          | 2001-2017          | 3.80 (3.33 – 4.28)     | <0.001  | 3.80 (3.33 – 4.28)    | <0.001  |
| 85+                            | 2001-2017          | 3.09 (2.35 – 3.84)     | <0.001  | 3.09 (2.35 – 3.84)    | <0.001  |
| <b>SEER Summary Stage 2000</b> |                    |                        |         |                       |         |
| Localized                      | 2001-2005          | -2.78 (-5.54 – 0.05)   | 0.054   | -0.30 (-1.02 – 0.43)  | 0.425   |
|                                | 2005-2017          | 0.55 (0.05 – 1.05)     | 0.034   |                       |         |
| Regional                       | 2001-2005          | 0.52 (-2.31 – 3.43)    | 0.697   | 3.10 (2.38 – 3.83)    | <0.001  |
|                                | 2005-2017          | 3.98 (3.54 – 4.42)     | <0.001  |                       |         |
| Distant                        | 2001-2005          | 26.52 (11.66 – 43.35)  | 0.002   | 3.26 (-1.30 – 8.04)   | 0.164   |
|                                | 2005-2015          | 1.80 (-0.69 – 4.35)    | 0.137   |                       |         |
|                                | 2015-2017          | -26.12 (-45.85 – 0.81) | 0.055   |                       |         |
| Other                          | 2001-2014          | -2.43 (-4.66 – -0.15)  | 0.039   | 1.09 (-2.74 – 5.06)   | 0.583   |
|                                | 2014-2017          | 17.85 (4.07 – 44.77)   | 0.108   |                       |         |
| <b>Tumor size<sup>d</sup></b>  |                    |                        |         |                       |         |
| ≤1                             | 2000-2016          | 3.94 (2.99 – 4.9)      | <0.001  | 3.94 (2.99 – 4.9)     | <0.001  |
| >1 to ≤2                       | 2000-2014          | 4.76 (4.06 – 5.47)     | <0.001  | 3.23 (1.82 – 4.67)    | <0.001  |
|                                | 2014-2016          | -6.86 (-16.83 – 4.32)  | 0.197   |                       |         |
| >2 to ≤4                       | 2000-2014          | 5.14 (4.37 – 5.92)     | <0.001  | 4.05 (2.55 – 5.58)    | <0.001  |
|                                | 2014-2016          | -3.23 (-14.05 – 8.94)  | 0.5571  |                       |         |
| >4                             | 2000-2016          | 4.58 (3.71 – 5.45)     | <0.001  | 4.58 (3.71 – 5.45)    | <0.001  |
| Unknown                        | 2000-2016          | -2.48 (-3.72 – -1.23)  | 0.0008  | -2.48 (-3.72 – -1.23) | 0.0008  |

Abbreviations: APC, annual percentage change; AAPC, average annual percentage change; SEER, Surveillance Epidemiology, and End Results Program

<sup>a</sup> Rates were calculated as number of cases per 100 000 person-years and age adjusted to the 2000 US standard population.

<sup>b</sup> The calendar period of each segment was defined based on the identification of calendar years when a statistically significant change in the APC occurred (ie, the joinpoint).

<sup>c</sup> Others include Asian/Pacific Islander, American Indian/Alaskan Native, and other.

<sup>d</sup> Trends in annual Oropharyngeal Squamous Cell Carcinoma Incidence Rates according to AJCC/TNM Stage and Tumor Size are calculated using the SEER-18 Database

**eTable 11.** Trends in Oropharyngeal Squamous Cell Carcinoma Incidence Rates<sup>a</sup> During 2001-2017 among Women

|                                | Trends <sup>b</sup>                 |                                                                         |                         |                                      |         |
|--------------------------------|-------------------------------------|-------------------------------------------------------------------------|-------------------------|--------------------------------------|---------|
|                                | Year                                | APC (95% CI)                                                            | P Value                 | Overall (2001-2017)<br>AAPC (95% CI) | P Value |
| <b>Women (Overall)</b>         | 2001-2015<br>2015-2017              | 1.02 (0.70 – 1.34)<br>-3.31 (-9.16 – 2.92)                              | <0.001<br>0.263         | 0.47 (-0.28 – 1.22)                  | 0.221   |
| <b>Race/Ethnicity</b>          |                                     |                                                                         |                         |                                      |         |
| NHW                            | 2001-2015<br>2015-2017              | 1.70 (1.36 – 2.03)<br>-2.80 (-8.93 – 3.74)                              | <0.001<br>0.361         | 1.12 (0.34 – 1.91)                   | 0.005   |
| NHB                            | 2001-2017                           | -1.91 (-2.35 – -1.47)                                                   | <0.001                  | -1.91 (-2.35 – -1.47)                | <0.001  |
| Hispanic                       | 2001-2017                           | 0.60 (-0.33 – 1.54)                                                     | 0.189                   | 0.60 (-0.33 – 1.54)                  | 0.189   |
| Other <sup>c,d</sup>           | 2001-2017                           | 0.99 (-0.75 – 2.76)                                                     | 0.246                   | 0.99 (-0.75 – 2.76)                  | 0.246   |
| <b>Age at diagnosis, y</b>     |                                     |                                                                         |                         |                                      |         |
| <45                            | 2001-2017                           | -1.03 (-2.01 – -0.03)                                                   | 0.044                   | -1.03 (-2.01 – -0.03)                | 0.044   |
| 45-54                          | 2001-2011<br>2011-2017              | 2.80 (1.51 – 4.11)<br>-2.53 (-5.09 – 0.10)                              | <0.001<br>0.058         | 0.77 (-0.38 – 1.93)                  | 0.188   |
| 55-64                          | 2001-2017                           | 1.60 (1.26 – 1.95)                                                      | <0.001                  | 1.60 (1.26 – 1.95)                   | <0.001  |
| 65-74                          | 2001-2017                           | 0.33 (-0.17 – 0.82)                                                     | 0.180                   | 0.33 (-0.17 – 0.82)                  | 0.180   |
| 75-84                          | 2001-2003<br>2003-2017              | -5.96 (-19.57 – 9.96)<br>1.06 (0.33 – 1.81)                             | 0.409<br>0.009          | 0.16 (-1.68 – 2.03)                  | 0.867   |
| 85+                            | 2001-2017                           | 0.58 (-0.51 – 1.68)                                                     | 0.279                   | 0.58 (-0.51 – 1.68)                  | 0.279   |
| <b>SEER Summary Stage 2000</b> |                                     |                                                                         |                         |                                      |         |
| Localized                      | 2001-2017                           | -0.90 (-1.42 – -0.38)                                                   | 0.002                   | -0.90 (-1.42 – -0.38)                | 0.002   |
| Regional                       | 2001-2004<br>2001-2017              | -2.82 (-6.44 – 0.95)<br>1.90 (1.53 – 2.27)                              | 0.127<br><0.001         | 1.00 (0.30 – 1.70)                   | 0.005   |
| Distant                        | 2001-2005<br>2005-2015<br>2015-2017 | 23.87 (10.40 – 39.00)<br>0.30 (-2.17 – 2.84)<br>-29.60 (-49.62 – -1.62) | 0.002<br>0.790<br>0.041 | 1.16 (-3.39 – 5.93)                  | 0.623   |
| Other                          | 2001-2013<br>2013-2017              | -3.82 (-5.78 – -1.82)<br>9.42 (-1.55 – 21.61)                           | 0.001<br>0.088          | -0.67 (-3.36 – 2.10)                 | 0.633   |
| <b>Tumor size<sup>d</sup></b>  |                                     |                                                                         |                         |                                      |         |
| ≤1                             | 2000-2016                           | 1.95 (0.65 – 3.28)                                                      | 0.006                   | 1.95 (0.65 – 3.28)                   | 0.006   |
| >1 to ≤2                       | 2000-2016                           | 1.96 (1.15 – 2.77)                                                      | 0.0001                  | 1.96 (1.15 – 2.77)                   | 0.0001  |
| >2 to ≤4                       | 2000-2016                           | 2.6 (1.55 – 3.66)                                                       | 0.0001                  | 2.6 (1.55 – 3.66)                    | 0.0001  |
| >4                             | 2000-2016                           | 2.22 (1.1 – 3.36)                                                       | 0.0007                  | 2.22 (1.1 – 3.36)                    | 0.0007  |
| Unknown                        | 2000-2016                           | -5.24 (-6.16 – -4.3)                                                    | <0.001                  | -5.24 (-6.16 – -4.3)                 | <0.001  |

Abbreviations: APC, annual percentage change; AAPC, average annual percentage change; SEER, Surveillance Epidemiology, and End Results Program

<sup>a</sup> Rates were calculated as number of cases per 100 000 person-years and age adjusted to the 2000 US standard population.

<sup>b</sup> The calendar period of each segment was defined based on the identification of calendar years when a statistically significant change in the APC occurred (ie, the joinpoint).

<sup>c</sup> Others include Asian/Pacific Islander, American Indian/Alaskan Native, and other.

<sup>d</sup> Trends in annual Oropharyngeal Squamous Cell Carcinoma Incidence Rates according to AJCC/TNM Stage and Tumor Size are calculated using the SEER-18 Database

**eTable 12.** Trends in oropharyngeal cancer incidence rates<sup>a</sup> according to state residency during 2001-2017 among men in the United States

| State                    | Trend <sup>b</sup>                  |                                                                    |                          |                      |         |
|--------------------------|-------------------------------------|--------------------------------------------------------------------|--------------------------|----------------------|---------|
|                          |                                     |                                                                    |                          | Overall (2001-2017)  |         |
|                          | Year                                | APC (95% CI)                                                       | P Value                  | AAPC (95% CI)        | P Value |
| Alaska                   | 2001-2017                           | 1.39 (-0.99 – 3.83)                                                | 0.233                    | 1.39 (-0.99 – 3.83)  | 0.233   |
| Alabama                  | 2001-2017                           | 2.47 (1.54 -3.40)                                                  | <0.001                   | 2.47 (1.54 -3.40)    | <0.001  |
| Arkansas                 | 2001-2017                           | 3.19 (2.27 – 4.12)                                                 | <0.001                   | 3.19 (2.27 – 4.12)   | <0.001  |
| Arizona                  | 2001-2015<br>2015-2017              | 3.56 (2.84 – 4.29)<br>-8.09 (-18.52 – 3.67)                        | <0.001<br>0.153          | 2.03 (0.55 – 3.53)   | 0.007   |
| California               | 2001-2017                           | 1.85 (1.47 – 2.24)                                                 | <0.001                   | 1.85 (1.47 – 2.24)   | <0.001  |
| Colorado                 | 2001-2017                           | 3.72 (2.99 – 4.45)                                                 | <0.001                   | 3.72 (2.99 – 4.45)   | <0.001  |
| Connecticut              | 2001-2017                           | 2.98 (2.38 – 3.58)                                                 | <0.001                   | 2.98 (2.38 – 3.58)   | <0.001  |
| DC                       | 2001-2017                           | -1.27 (-3.34 – 0.84)                                               | 0.216                    | -1.27 (-3.34 – 0.84) | 0.216   |
| Delaware                 | 2001-2017                           | 2.21 (0.50 – 3.95)                                                 | 0.015                    | 2.21 (0.50 – 3.95)   | 0.015   |
| Florida                  | 2001-2011<br>2011-2014<br>2014-2017 | 1.96 (1.24 – 2.68)<br>5.20 (-2.44 – 13.45)<br>-2.47 (-5.92 – 1.10) | <0.001<br>0.163<br>0.150 | 1.71 (0.28 – 3.15)   | 0.019   |
| Georgia                  | 2001-2017                           | 2.20 (1.48 – 2.92)                                                 | <0.001                   | 2.20 (1.48 – 2.92)   | <0.001  |
| Hawaii                   | 2001-2017                           | 3.25 (2.04 – 4.48)                                                 | <0.001                   | 3.25 (2.04 – 4.48)   | <0.001  |
| Idaho                    | 2001-2017                           | 3.23 (1.86 – 4.63)                                                 | <0.001                   | 3.23 (1.86 – 4.63)   | <0.001  |
| Illinois                 | 2001-2017                           | 2.62 (2.06 – 3.18)                                                 | <0.001                   | 2.62 (2.06 – 3.18)   | <0.001  |
| Indiana                  | 2001-2017                           | 3.63 (2.99 – 4.27)                                                 | <0.001                   | 3.63 (2.99 – 4.27)   | <0.001  |
| Iowa                     | 2001-2017                           | 3.97 (2.86 – 5.09)                                                 | <0.001                   | 3.97 (2.86 – 5.09)   | <0.001  |
| Kansas                   | 2001-2017                           | 4.70 (3.82 – 5.60)                                                 | <0.001                   | 4.70 (3.82 – 5.60)   | <0.001  |
| Kentucky                 | 2001-2017                           | 3.86 (2.93 – 4.79)                                                 | <0.001                   | 3.86 (2.93 – 4.79)   | <0.001  |
| Louisiana                | 2001-2017                           | 2.18 (1.60 – 2.75)                                                 | <0.001                   | 2.18 (1.60 – 2.75)   | <0.001  |
| Massachusetts            | 2001-2017                           | 2.41 (1.75 – 3.07)                                                 | <0.001                   | 2.41 (1.75 – 3.07)   | <0.001  |
| Maryland                 | 2001-2017                           | 2.95 (1.94 – 3.96)                                                 | <0.001                   | 2.95 (1.94 – 3.96)   | <0.001  |
| Maine                    | 2001-2017                           | 2.77 (1.94 – 3.61)                                                 | <0.001                   | 2.77 (1.94 – 3.61)   | <0.001  |
| Michigan                 | 2001-2017                           | 3.22 (2.61 – 3.84)                                                 | <0.001                   | 3.22 (2.61 – 3.84)   | <0.001  |
| Minnesota                | 2001-2017                           | 3.50 (2.61 – 4.40)                                                 | <0.001                   | 3.50 (2.61 – 4.40)   | <0.001  |
| Missouri                 | 2001-2017                           | 3.45 (2.81 – 4.09)                                                 | <0.001                   | 3.45 (2.81 – 4.09)   | <0.001  |
| Mississippi <sup>c</sup> | 2003-2017                           | 2.35 (1.56 – 3.15)                                                 | <0.001                   | 2.35 (1.56 – 3.15)   | <0.001  |
| Montana                  | 2001-2017                           | 3.77 (2.39 – 5.17)                                                 | <0.001                   | 3.77 (2.39 – 5.17)   | <0.001  |
| North Carolina           | 2001-2017                           | 2.68 (2.10 – 3.26)                                                 | <0.001                   | 2.68 (2.10 – 3.26)   | <0.001  |
| North Dakota             | 2004-2017                           | 2.79 (0.09 – 5.57)                                                 | 0.044                    | 2.79 (0.09 – 5.57)   | 0.044   |
| Nebraska                 | 2001-2017                           | 3.42 (1.97 – 4.89)                                                 | <0.001                   | 3.42 (1.97 – 4.89)   | <0.001  |
| New Hampshire            | 2001-2017                           | 3.22 (1.79 – 4.66)                                                 | <0.001                   | 3.22 (1.79 – 4.66)   | <0.001  |
| New Jersey               | 2001-2017                           | 2.83 (2.27 – 3.39)                                                 | <0.001                   | 2.83 (2.27 – 3.39)   | <0.001  |
| New Mexico               | 2001-2017                           | 2.76 (1.36 – 4.18)                                                 | 0.001                    | 2.76 (1.36 – 4.18)   | 0.001   |
| Nevada                   | 2001-2017                           | 2.01 (0.52 – 3.53)                                                 | 0.012                    | 2.01 (0.52 – 3.53)   | 0.012   |
| New York                 | 2001-2017                           | 2.13 (1.55 – 2.70)                                                 | <0.001                   | 2.13 (1.55 – 2.70)   | <0.001  |
| Ohio                     | 2001-2017                           | 3.70 (3.07 – 4.33)                                                 | <0.001                   | 3.70 (3.07 – 4.33)   | <0.001  |
| Oklahoma                 | 2001-2017                           | 2.29 (1.67 – 2.92)                                                 | <0.001                   | 2.29 (1.67 – 2.92)   | <0.001  |
| Oregon                   | 2001-2017                           | 3.59 (2.46 – 4.74)                                                 | <0.001                   | 3.59 (2.46 – 4.74)   | <0.001  |
| Pennsylvania             | 2001-2017                           | 2.86 (2.36 – 3.36)                                                 | <0.001                   | 2.86 (2.36 – 3.36)   | <0.001  |
| Rhode Island             | 2001-2017                           | 2.27 (0.60 – 3.96)                                                 | 0.011                    | 2.27 (0.60 – 3.96)   | 0.011   |
| South Carolina           | 2001-2017                           | 2.47 (1.45 – 3.49)                                                 | <0.001                   | 2.47 (1.45 – 3.49)   | <0.001  |
| South Dakota             | 2002-2017                           | 5.98 (2.90 – 9.16)                                                 | 0.001                    | 5.98 (2.90 – 9.16)   | 0.001   |
| Tennessee                | 2001-2017                           | 3.81 (3.23 – 4.39)                                                 | <0.001                   | 3.81 (3.23 – 4.39)   | <0.001  |

**eTable 12 (continued).** Trends in oropharyngeal cancer incidence rates<sup>a</sup> according to state residency during 2001-2017 among men in the United States

| State         | Trend <sup>b</sup> |                     |         |                     |         |
|---------------|--------------------|---------------------|---------|---------------------|---------|
|               |                    |                     |         | Overall (2001-2017) |         |
|               | Year               | APC (95% CI)        | P Value | AAPC (95% CI)       | P Value |
| Texas         | 2001-2017          | 1.98 (1.45 – 2.51)  | <0.001  | 1.98 (1.45 – 2.51)  | <0.001  |
| Utah          | 2001-2017          | 4.03 (2.28 – 5.82)  | <0.001  | 4.03 (2.28 – 5.82)  | <0.001  |
| Virginia      | 2001-2017          | 2.41 (1.64 – 3.18)  | <0.001  | 2.41 (1.64 – 3.18)  | <0.001  |
| Vermont       | 2001-2017          | 2.41 (1.64 – 3.18)  | <0.001  | 2.41 (1.64 – 3.18)  | <0.001  |
| Washington    | 2001-2017          | 2.73 (1.90 – 3.58)  | <0.001  | 2.73 (1.90 – 3.58)  | <0.001  |
| Wisconsin     | 2001-2017          | 2.80 (2.17 – 3.44)  | <0.001  | 2.80 (2.17 – 3.44)  | <0.001  |
| West Virginia | 2001-2017          | 3.82 (2.66 – 4.99)  | <0.001  | 3.82 (2.66 – 4.99)  | <0.001  |
| Wyoming       | 2003-2017          | 0.42 (-2.80 – 3.76) | 0.776   | 0.42 (-2.80 – 3.76) | 0.776   |

Abbreviations: APC, annual percentage change; AAPC, average annual percentage change;

<sup>a</sup> Rates were calculated as number of cases per 100 000 person-years and age adjusted to the 2000 US standard population.

<sup>b</sup> The calendar period of each segment was defined based on the identification of calendar years when a statistically significant change in the APC occurred (ie, the joinpoint).

<sup>c</sup> The data for Mississippi are available starting from 2003. Since 2001 and 2002 data are not available, Mississippi is excluded in all analysis except state specific incidence trends analysis.

**eTable 13.** Trends in oropharyngeal cancer incidence rates<sup>a</sup> according to state residency during 2001-2017 among women in the United States

| State                    | Trend <sup>b</sup>                               |                                                                                                    |                                  |                                      |         |
|--------------------------|--------------------------------------------------|----------------------------------------------------------------------------------------------------|----------------------------------|--------------------------------------|---------|
|                          | Year                                             | APC (95% CI)                                                                                       | P Value                          | Overall (2001-2017)<br>AAPC (95% CI) | P Value |
| Alaska                   | N/A                                              | N/A                                                                                                | N/A                              | N/A                                  | N/A     |
| Alabama                  | 2001-2017                                        | 1.63 (0.46 – 2.82)                                                                                 | 0.010                            | 1.63 (0.46 – 2.82)                   | 0.010   |
| Arkansas                 | 2001-2017                                        | 2.57 (0.94 – 4.22)                                                                                 | 0.004                            | 2.57 (0.94 – 4.22)                   | 0.004   |
| Arizona                  | 2001-2017                                        | -0.13 (-2.08 – 1.86)                                                                               | 0.890                            | -0.13 (-2.08 – 1.86)                 | 0.890   |
| California               | 2001-2017                                        | -0.83 (-1.38 – -0.27)                                                                              | 0.007                            | -0.83 (-1.38 – -0.27)                | 0.007   |
| Colorado                 | 2001-2017                                        | 0.67 (-1.00 – 2.36)                                                                                | 0.410                            | 0.67 (-1.00 – 2.36)                  | 0.410   |
| Connecticut              | 2001-2017                                        | 2.17 (0.11 – 3.93)                                                                                 | 0.017                            | 2.17 (0.11 – 3.93)                   | 0.017   |
| DC                       | N/A                                              | N/A                                                                                                | N/A                              | N/A                                  | N/A     |
| Delaware                 | N/A                                              | N/A                                                                                                | N/A                              | N/A                                  | N/A     |
| Florida                  | 2001-2017                                        | 0.10 (-0.60 – 0.80)                                                                                | 0.770                            | 0.10 (-0.60 – 0.80)                  | 0.770   |
| Georgia                  | 2001-2017                                        | -0.35 (-1.60 – 0.92)                                                                               | 0.566                            | -0.35 (-1.60 – 0.92)                 | 0.566   |
| Hawaii                   | 2005-2016                                        | -1.38                                                                                              | N/A                              | -1.38                                | N/A     |
| Idaho                    | 2012-2016                                        | 2.54 (-15.65 – 24.64)                                                                              | 0.711                            | 2.54 (-15.65 – 24.64)                | 0.711   |
| Illinois                 | 2001-2017                                        | 0.58 (-0.39 – 1.55)                                                                                | 0.225                            | 0.58 (-0.39 – 1.55)                  | 0.225   |
| Indiana                  | 2001-2017                                        | 2.39 (0.81 – 4.01)                                                                                 | 0.006                            | 2.39 (0.81 – 4.01)                   | 0.006   |
| Iowa                     | 2001-2017                                        | 2.01 (0.06 – 4.00)                                                                                 | 0.044                            | 2.01 (0.06 – 4.00)                   | 0.044   |
| Kansas                   | 2002-2017                                        | 0.89 (-1.92 – 3.77)                                                                                | 0.511                            | 0.89 (-1.92 – 3.77)                  | 0.511   |
| Kentucky                 | 2001-2017                                        | 2.65 (0.67 – 4.66)                                                                                 | 0.012                            | 2.65 (0.67 – 4.66)                   | 0.012   |
| Louisiana                | 2001-2017                                        | 3.09 (1.68 – 4.52)                                                                                 | <0.001                           | 3.09 (1.68 – 4.52)                   | <0.001  |
| Massachusetts            | 2001-2017                                        | 1.29 (-0.43 – 3.05)                                                                                | 0.132                            | 1.29 (-0.43 – 3.05)                  | 0.132   |
| Maryland                 | 2001-2017                                        | 1.24 (0.04 – 2.46)                                                                                 | 0.044                            | 1.24 (0.04 – 2.46)                   | 0.044   |
| Maine                    | 2001-2017                                        | 0.90 (-0.30 – 2.12)                                                                                | 0.130                            | 0.90 (-0.30 – 2.12)                  | 0.130   |
| Michigan                 | 2001-2017                                        | 0.39 (-0.77 – 1.57)                                                                                | 0.482                            | 0.39 (-0.77 – 1.57)                  | 0.482   |
| Minnesota                | 2001-2017                                        | 0.46 (-0.93 – 1.88)                                                                                | 0.494                            | 0.46 (-0.93 – 1.88)                  | 0.494   |
| Missouri                 | 2001-2017                                        | 1.28 (0.35 – 2.23)                                                                                 | 0.010                            | 1.28 (0.35 – 2.23)                   | 0.010   |
| Mississippi <sup>c</sup> | 2003-2017                                        | 3.29 (1.90 – 4.71)                                                                                 | <0.001                           | 3.29 (1.90 – 4.71)                   | <0.001  |
| Montana                  | N/A                                              | N/A                                                                                                | N/A                              | N/A                                  | N/A     |
| North Carolina           | 2001-2017                                        | 1.30 (0.40 – 2.20)                                                                                 | 0.007                            | 1.30 (0.40 – 2.20)                   | 0.007   |
| North Dakota             | N/A                                              | N/A                                                                                                | N/A                              | N/A                                  | N/A     |
| Nebraska                 | 2001-2015                                        | -2.13 (-4.94 – 0.76)                                                                               | 0.109                            | -2.13 (-4.94 – 0.76)                 | 0.109   |
| New Hampshire            | 2001-2017                                        | -2.16 (-4.10 – -0.18)                                                                              | 0.036                            | -2.16 (-4.10 – -0.18)                | 0.036   |
| New Jersey               | 2001-2017                                        | 0.70 (-0.64 – 2.06)                                                                                | 0.285                            | 0.70 (-0.64 – 2.06)                  | 0.285   |
| New Mexico               | 2009-2016                                        | -4.23 (-12.54 – 4.86)                                                                              | 0.177                            | -4.23 (-12.54 – 4.86)                | 0.177   |
| Nevada                   | 2001-2003<br>2003-2006<br>2006-2009<br>2009-2017 | -26.90 (-51.22 – 9.55)<br>20.87 (-19.66 – 81.86)<br>-11.31 (-37.85 – 26.58)<br>2.06 (-1.59 – 5.85) | 0.107<br>0.300<br>0.441<br>0.219 | -1.58 (-10.23 – 7.91)                | 0.735   |
| New York                 | 2001-2017                                        | 0.58 (-0.14 – 1.30)                                                                                | 0.109                            | 0.58 (-0.14 – 1.30)                  | 0.109   |
| Ohio                     | 2001-2017                                        | 2.24 (1.52 – 2.96)                                                                                 | <0.001                           | 2.24 (1.52 – 2.96)                   | <0.001  |
| Oklahoma                 | 2001-2017                                        | 1.00 (-1.25 – 3.30)                                                                                | 0.362                            | 1.00 (-1.25 – 3.30)                  | 0.362   |
| Oregon                   | 2001-2017                                        | 1.04 (-0.59 – 2.71)                                                                                | 0.196                            | 1.04 (-0.59 – 2.71)                  | 0.196   |
| Pennsylvania             | 2001-2007<br>2007-2011<br>2011-2017              | -1.71 (-6.02 – 2.80)<br>8.09 (-4.19 – 21.94)<br>-2.71 (-6.54 – 1.27)                               | 0.408<br>0.178<br>0.155          | 0.27 (-2.95 – 3.59)                  | 0.872   |
| Rhode Island             | 2005-2017                                        | 1.30 (-2.18 – 4.91)                                                                                | 0.253                            | 1.30 (-2.18 – 4.91)                  | 0.253   |
| South Carolina           | 2001-2017                                        | 0.43 (-0.98 – 1.86)                                                                                | 0.529                            | 0.43 (-0.98 – 1.86)                  | 0.529   |
| South Dakota             | N/A                                              | N/A                                                                                                | N/A                              | N/A                                  | N/A     |

**eTable 13 (continued).** Trends in oropharyngeal cancer incidence rates<sup>a</sup> according to state residency during 2001-2017 among women in the United States

| State         | Trend <sup>b</sup> |                     |         |                     |         |
|---------------|--------------------|---------------------|---------|---------------------|---------|
|               |                    |                     |         | Overall (2001-2017) |         |
|               | Year               | APC (95% CI)        | P Value | AAPC (95% CI)       | P Value |
| Tennessee     | 2001-2017          | 1.33 (-0.33 – 3.03) | 0.110   | 1.33 (-0.33 – 3.03) | 0.110   |
| Texas         | 2001-2017          | 0.48 (-0.46 – 1.42) | 0.297   | 0.48 (-0.46 – 1.42) | 0.297   |
| Utah          | N/A                | N/A                 | N/A     | N/A                 | N/A     |
| Virginia      | 2001-2017          | 0.04 (-1.06 – 1.15) | 0.941   | 0.04 (-1.06 – 1.15) | 0.941   |
| Vermont       | N/A                | N/A                 | N/A     | N/A                 | N/A     |
| Washington    | 2001-2017          | 0.15 (-1.30 – 1.62) | 0.829   | 0.15 (-1.30 – 1.62) | 0.829   |
| Wisconsin     | 2001-2017          | 0.74 (-0.40 – 1.89) | 0.188   | 0.74 (-0.40 – 1.89) | 0.188   |
| West Virginia | 2001-2017          | 1.42 (-1.41 – 4.33) | 0.305   | 1.42 (-1.41 – 4.33) | 0.305   |
| Wyoming       | N/A                | N/A                 | N/A     | N/A                 | N/A     |

Abbreviations: APC, annual percentage change; AAPC, average annual percentage change;

<sup>a</sup> Rates were calculated as number of cases per 100 000 person-years and age adjusted to the 2000 US standard population.

<sup>b</sup> The calendar period of each segment was defined based on the identification of calendar years when a statistically significant change in the APC occurred (ie, the joinpoint).

<sup>c</sup> The data for Mississippi are available starting from 2003. Since 2001 and 2002 data are not available, Mississippi is excluded in all analysis except state specific incidence trends analysis.



**eTable 14.** Observed and incidence-based Oropharyngeal Cancer Mortality Rates<sup>a</sup> by Sex During 2001-2017

| Year of death | Observed mortality (Nationally) |                     |           |                     | Incidence-based mortality (SEER-13 regions) |                            |           |                            |
|---------------|---------------------------------|---------------------|-----------|---------------------|---------------------------------------------|----------------------------|-----------|----------------------------|
|               | Men                             |                     | Women     |                     | Men                                         |                            | Women     |                            |
|               | No. death                       | Rate (95% CI)       | No. death | Rate (95% CI)       | No. death                                   | Rate <sup>b</sup> (95% CI) | No. death | Rate <sup>b</sup> (95% CI) |
| 2001          | 3920                            | 3.14<br>(3.04-3.24) | 1915      | 1.17<br>(1.12-1.23) | 201                                         | 1.23<br>(1.07-1.42)        | 68        | 0.34<br>(0.26-0.43)        |
| 2002          | 3922                            | 3.08<br>(2.98-3.18) | 1919      | 1.16<br>(1.11-1.21) | 220                                         | 1.33<br>(1.16-1.52)        | 91        | 0.44<br>(0.35-0.54)        |
| 2003          | 4054                            | 3.09<br>(3-3.19)    | 1892      | 1.13<br>(1.07-1.18) | 204                                         | 1.23<br>(1.06-1.41)        | 77        | 0.37<br>(0.3-0.47)         |
| 2004          | 3977                            | 2.97<br>(2.88-3.06) | 1951      | 1.14<br>(1.09-1.2)  | 202                                         | 1.16<br>(1.01-1.34)        | 70        | 0.34<br>(0.26-0.43)        |
| 2005          | 4026                            | 2.93<br>(2.84-3.02) | 1955      | 1.12<br>(1.07-1.17) | 204                                         | 1.14<br>(0.99-1.31)        | 83        | 0.39<br>(0.31-0.49)        |
| 2006          | 4031                            | 2.87<br>(2.78-2.96) | 1891      | 1.07<br>(1.03-1.12) | 202                                         | 1.09<br>(0.94-1.25)        | 71        | 0.33<br>(0.26-0.42)        |
| 2007          | 4219                            | 2.92<br>(2.83-3.01) | 1937      | 1.08<br>(1.03-1.13) | 211                                         | 1.14<br>(0.99-1.31)        | 82        | 0.37<br>(0.3-0.46)         |
| 2008          | 4262                            | 2.88<br>(2.79-2.97) | 1933      | 1.06<br>(1.01-1.1)  | 242                                         | 1.26<br>(1.1-1.43)         | 58        | 0.26<br>(0.2-0.34)         |
| 2009          | 4160                            | 2.75<br>(2.66-2.83) | 1860      | 0.99<br>(0.95-1.04) | 233                                         | 1.23<br>(1.08-1.41)        | 72        | 0.31<br>(0.24-0.39)        |
| 2010          | 4427                            | 2.84<br>(2.75-2.93) | 2033      | 1.07<br>(1.02-1.12) | 250                                         | 1.24<br>(1.08-1.4)         | 79        | 0.33<br>(0.26-0.41)        |
| 2011          | 4746                            | 2.96<br>(2.88-3.05) | 1972      | 1.02<br>(0.97-1.06) | 225                                         | 1.11<br>(0.96-1.26)        | 89        | 0.38<br>(0.3-0.47)         |
| 2012          | 4862                            | 2.95<br>(2.87-3.04) | 2025      | 1.02<br>(0.98-1.07) | 258                                         | 1.23<br>(1.08-1.39)        | 70        | 0.28<br>(0.22-0.35)        |
| 2013          | 4808                            | 2.84<br>(2.76-2.93) | 2046      | 1.01<br>(0.97-1.06) | 291                                         | 1.36<br>(1.2-1.53)         | 80        | 0.32<br>(0.25-0.4)         |
| 2014          | 5218                            | 3.03<br>(2.95-3.11) | 2060      | 1<br>(0.96-1.05)    | 281                                         | 1.29<br>(1.14-1.45)        | 74        | 0.29<br>(0.22-0.36)        |
| 2015          | 5298                            | 2.98<br>(2.9-3.06)  | 2236      | 1.06<br>(1.01-1.1)  | 288                                         | 1.27<br>(1.12-1.43)        | 100       | 0.37<br>(0.3-0.45)         |
| 2016          | 5552                            | 3.06<br>(2.98-3.14) | 2289      | 1.06<br>(1.02-1.11) | 329                                         | 1.41<br>(1.25-1.57)        | 93        | 0.35<br>(0.28-0.43)        |
| 2017          | 5648                            | 3.05<br>(2.97-3.13) | 2247      | 1.02<br>(0.98-1.07) | 344                                         | 1.45<br>(1.3-1.62)         | 80        | 0.28<br>(0.22-0.36)        |

<sup>a</sup> Rates were calculated as number of deaths per 100 000 person-years and age adjusted to the 2000 US standard population.

<sup>b</sup> Based on cases diagnosed during 1992-2017
